# Supplementary material
Source: Research Square preprint supplement (doi:10.21203/rs.3.rs-9051667/v1)
Supplement: Supplementary file 1 [file 9d0eefac6d81bc8e0253d6ac.docx]

**Neolithic artefacts in ‘*Jade*’ from *Rocca di Cavour* (Northwestern-Italy):**

**archaeometric characterization, geologic contextualization and provenance**

Roberto Giustetto1,2,3*, Michele Borgogno1, Luca Barale4, Ursula Perrone1, Roberto Compagnoni1

1Department of Earth Sciences, University of Turin, via Valperga Caluso 35, 10125 Torino (Italy)

2NIS - Nanostructured Interfaces and Surfaces Centre, via Quarello 15/A, 10135 Torino (Italy)

3INFN - National Institute of Nuclear Physics, via Giuria 5, 10125 Torino (Italy)

4National Research Council of Italy, Institute of Geosciences and Earth Resources, via Valperga Caluso, 35 – 10125 Torino (Italy)

*Corresponding author: [*roberto.giustetto*@*unito.it*](mailto:roberto.giustetto@unito.it) – tel. +39-011-6705122 – fax +39-011-6705128

**Supplementary Material**

**Tables**

|  | **Inventory code** | **Analytical code** | **Functional description** | **Archaeological notes** | **Lithotype** | **Petrographic notes**  **(stereomicroscopy in reflected light)** | **Density (g/cm3)** | **In-depth analyses** |
| --- | --- | --- | --- | --- | --- | --- | --- | --- |
| 1 | 1327/1 | **=** | Cutting-edge | Fragment | Eclogite | Cr-containing diopside | 3.33 | XRD |
| 2 | 1327/2 | = | Striker | Splintered and bush-hammered | Eclogite | **=** | 3.44 |  |
| 3 | 1327/3 | = | Splinter | **=** | Eclogite | = | 3.54 |  |
| 4 | 1327/4 | = | Splinter | = | Omphacitite | = | 3.44 | XRD |
| 5 | 1327/5 | PIEM90 | Splinter | = | Garnet-omphacitite | = | 3.40 | XRD; OM in p.l. |
| 6 | 1327/6 | **=** | Pebble | = | Serpentinite | **=** | 2.65 |  |
| 7 | 1327/7 | = | Tang | Splintered | Eclogite | Zoisite pseudomorphoses on original lawsonite | 3.46 |  |
| 8 | 1327/8 | = | Tang | Splintered and bush-hammered | Eclogite | **=** | 3.41 | XRD |
| 9 | 1327/9 | = | Cutting-edge | Fragment | Garnet-omphacitite | = | 3.35 | XRD |
| 10 | 1327/10 | PIEM85 | Axe heel | Fragmented, splintered and bush-hammered | Garnet-omphacitite | = | 3.43 | XRD; OM in p.l. |
| 11 | 1327/11 | = | Axe heel | Fragmented, splintered and bush-hammered | Eclogite | = | 3.45 |  |
| 12 | 1327/12 | PIEM87 | Axehead | Roughout, splintered and partly bush-hammered | Eclogite | Garnets with atoll-like structure | 3.48 | XRD; OM in p.l. |
| 13 | 1327/13 | PIEM78 | Axehead | Roughout, re-used as a striker | Garnet-omphacitite | Zoisite pseudomorphoses on original lawsonite | 3.37 | XRD; OM in p.l. |
| 14 | 1327/14 | PIEM75 | Cutting-edge | Fragment | Garnet-omphacitite | Zoisite pseudomorphoses on original lawsonite | 3.46 | XRD; OM in p.l.; SEM-EDS |
| 15 | 1327/15 | PIEM82 | Tang | Splintered and bush-hammered | Jadeitite | = | 3.35 | XRD; OM in p.l.; SEM-EDS |
| 16 | 1327/16 | **=** | Cutting-edge | Fragment strongly bush-hammered | Eclogite | Zoisite pseudomorphoses on original lawsonite | 3.31 |  |
| 17 | 1327/17 | = | Tang | Bush-hammered on the sides | Jadeitite | = | 3.33 | XRD |
| 18 | 1327/18 | = | Cutting-edge | Fragment, splintered and polished but not bush-hammered | Eclogite | Banded structure | 3.64 |  |
| 19 | 1327/19 | = | Axehead | Roughout, splintered and bush-hammered on the sides | Eclogite | Banded structure | 3.54 | XRD |
| 20 | 1327/20 | **=** | Splinter | **=** | Eclogite | **=** | 3.40 |  |
| 21 | 1327/21 | = | Splinter | = | Mixed Na-pyroxenite | = | 3.32 |  |
| 22 | 1327/22 | = | Splinter | = | Eclogite | = | 3.63 |  |
| 23 | 1327/23 | = | Splinter | **=** | Mixed Na-pyroxenite | = | 3.15 |  |
| 24 | 1327/24 | PIEM88 | Splinter | = | Eclogite | Regressed with abundant glaucophane | 3.27 | XRD; OM in p.l. |
| 25 | 1327/25 | = | Axehead | Fragment, polished and bush-hammered on one side | Eclogite | Fine grained | 3.63 |  |
| 26 | 1327/26 | PIEM77 | Axehead | Fragment, bush-hammered | Eclogite | **=** | 3.47 | XRD; OM in p.l.; SEM-EDS |
| 27 | 1327/27 | = | Splinter | = | Eclogite | = | 3.40 |  |
| 28 | 1327/28 | = | Tang | Bush-hammered | Eclogite | = | 3.48 |  |
| 29 | 1327/29 | PIEM86 | Axehead | Fragment, traces of bush-hammering | Eclogite | Zoisite pseudomorphoses on original lawsonite | 3.42 | XRD; OM in p.l. |
| 30 | 1327/30 | = | Axehead | Fragment, splinterd and bush-hammered | Eclogite | Banded structure with only omphacite levels | 3.52 |  |
| 31 | 1327/31 | = | Splinter | **=** | Garnet-omphacitite | **=** | 3.23 |  |
| 32 | 1327/32 | = | Splinter | = | Eclogite | = | 3.64 |  |
| 33 | 1327/33 | = | Splinter | = | Eclogite | = | 3.54 |  |
| 34 | 1327/34 | **=** | Splinter | = | Garnet-omphacitite | Porphyroblastic garnets | 3.51 |  |
| 35 | 1327/35 | = | Splinter | **=** | Eclogite | **=** | 3.63 |  |
| 36 | 1327/36 | PIEM92 | Tang | Splintered | Garnet-omphacitite | = | 3.36 | XRD; OM in p.l. |
| 37 | 1327/37 | PIEM91 | Splinter | = | Garnet-omphacitite | = | 3.41 |  |
| 38 | 1327/38 | = | Axehead | Roughout | Eclogite | Glaucophane porphyroblasts | 3.57 |  |
| 39 | 1327/A1 | = | Splinter | **=** | Omphacitite | = | 3.39 | XRD |
| 40 | 1327/A2 | PIEM84 | Splinter | = | Eclogite | Garnets with atoll-like structure | 3.44 | XRD; OM in p.l. |
| 41 | 1327/A3 | = | Striker | = | Eclogite | **=** | 3.38 | XRD |
| 42 | 1327/A4 | = | Splinter | = | Garnet-omphacitite | = | 3.41 | XRD |
| 43 | 1327/A5 | = | Axehead | Fragment, bush-hammered | Eclogite | = | 3.45 | XRD |
| 44 | 1327/A6 | **=** | Splinter | **=** | Garnet-omphacitite | = | 3.30 |  |
| 45 | 1327/A7 | = | Splinter | = | Prasinite | **=** | 3.13 |  |
| 46 | 1327/A8 | = | Splinter | = | Eclogite | = | 3.50 |  |
| 47 | 1327/A9 | = | Splinter | = | Eclogite | Banded structure | 3.52 | XRD |
| 48 | 1327/A10 | = | Splinter | **=** | Mixed Na-pyroxenite | **=** | 3.24 | XRD |
| 49 | 1327/A11 | = | Splinter | = | Garnet-omphacitite | = | 3.46 |  |
| 50 | 1327/A12 | **=** | Splinter | = | Eclogite | = | 3.66 |  |
| 51 | 1327/A13 | = | Splinter | = | Eclogite | = | 3.21 | XRD |
| 52 | 1327/A14 | = | Splinter | **=** | Eclogite | **=** | 3.64 |  |
| 53 | 1327/A15 | = | Cutting-edge | Unpolished | Serpentinite | = | 2.60 |  |
| 54 | 1327/A16 | = | Splinter | **=** | Omphacitite | = | 3.40 |  |
| 55 | 1327/A17 | = | Splinter | = | Eclogite | = | 3.90 | XRD |
| 56 | 1327/A18 | **=** | Splinter | = | Eclogite | **=** | 3.50 | XRD |
| 57 | 1327/A19 | = | Pebble | = | Gneiss | = | 2.59 |  |
| 58 | 1327/A20 | = | Pebble | **=** | Serpentinite | = | 2.62 |  |
| 59 | 1327/A21 | = | Pebble | = | Zoisitite | = | 3.18 |  |
| 60 | 1327/A22 | **=** | Pebble | = | Gneiss | **=** | 2.58 |  |
| 61 | 1327/A23 | = | Pebble | = | Serpentinite | = | 2.66 |  |
| 62 | 1327/A24 | = | Pebble | **=** | Metagabbro | With zoisite | 2.90 |  |
| 63 | 1327/A25 | = | Striker | = | Metagabbro | With zoisite | 3.14 | XRD |
| 64 | 1327/A26 | PIEM76 | Tang | Bush-hammered | Eclogite | Regressed with abundant glaucophane | 3.15 | XRD; OM in p.l.; SEM-EDS |
| 65 | 69227 | = | Striker | = | Eclogite | **=** | 3.46 | XRD |
| 66 | 69228 | = | Cutting-edge | Splintered, not bush-hammered | Eclogite | = | 3.27 |  |
| 67 | 69230 | = | Axehead | Roughout | Eclogite | = | 3.41 | XRD |
| 68 | 69231 | **=** | Cutting-edge | Fragment, splintered and bush-hammered on one side | Eclogite | = | 3.43 |  |
| 69 | 69232 | PIEM81 | Axehead | Bush-hammered | Jadeitite | With omphacite exsolutions | 3.32 | XRD; OM in p.l.; SEM-EDS |
| 70 | 69233(180) | = | Striker | = | Eclogite | = | 3.44 |  |
| 71 | 69381 | PIEM83 | Tang | Bush-hammered | Jadeitite | With omphacite exsolutions | 3.21 | XRD; OM in p.l.; SEM-EDS |
| 72 | 164 | = | Grindstone | Fragment | Gabbro | **=** | 2.90 |  |
| 73 | 211 | = | Bluing tool | = | Serpentinite | = | 2.64 |  |
| 74 | 220 | = | Tang | Bush-hammered | ??? | = | 3.08 |  |
| 75 | 275 | PIEM79 | Axehead | Roughout, splintered but not bush-hammered | Omphacitite | = | 3.40 | XRD; OM in p.l.; SEM-EDS |
| 76 | 324 | PIEM80 | Axehead | Roughout, splintered but not bush-hammered | Eclogite | Garnets with atoll-like structure | 3.48 | XRD; OM in p.l.; SEM-EDS |
| 77 | 687 | = | Pebble | **=** | Amphibolite | **=** | 3.08 |  |
| 78 | V1 | = | Splinter | = | Eclogite | = | 3.59 |  |
| 79 | V2 | = | Splinter | = | Eclogite | = | 3.89 |  |
| 80 | V3 | **=** | Splinter | = | Eclogite | = | 3.62 |  |
| 81 | V4 | = | Splinter | **=** | Omphacitite | **=** | 3.38 |  |
| 82 | V5 | = | Splinter | = | Jadeitite | = | 3.39 | XRD |
| 83 | V6 | = | Splinter | = | Eclogite | = | 3.67 |  |
| 84 | V7 | = | Splinter | = | Eclogite | = | 3.53 |  |
| 85 | V8 | = | Splinter | **=** | Omphacitite | **=** | 3.26 |  |
| 86 | V9 | **=** | Splinter | = | Eclogite | = | 3.44 |  |
| 87 | V10 | = | Splinter | = | Omphacitite | = | 3.33 |  |
| 88 | V11 | PIEM89 | Splinter | = | Omphacitite | = | 3.33 | XRD; OM in p.l.; SEM-EDS |
| 89 | V12 | = | Splinter | **=** | Eclogite | **=** | 3.50 |  |
| 90 | V13 | = | Splinter | = | Eclogite | = | 3.53 |  |
| 91 | V14 | = | Splinter | **=** | Eclogite | **=** | 3.80 |  |
| 92 | V15 | **=** | Splinter | = | Eclogite | = | 3.74 |  |
| 93 | V16 | = | Splinter | = | Eclogite | = | 3.44 |  |
| 94 | V17 | = | Pebble | = | ??? | = | = |  |
| 95 | V18 | = | Pebble | **=** | Serpentinite | **=** | 2.57 |  |
| 96 | V19 | = | Pebble | = | ??? | = | 3.11 |  |
| 97 | V20 | = | Pebble | = | Eclogite | = | 3.54 |  |
| 98 | V21 | **=** | Splinter | = | Eclogite | Garnets with atoll-like structure | 3.40 |  |

**Table S1.** Inventory codes, analytical codes, functional description, preliminary lithotype determination and density values of the 98 lithic implements/artefacts from the *Rocca di Cavour* archaeological site, based on the traditional archaeologic approach, density determination and stereo-microscopy observations in reflected light observations. Implements submitted to more in-depth, micro-invasive analyses are indicated in the last column.

| **Na-PYROXENE ROCKS** | | | | | | | | |
| --- | --- | --- | --- | --- | --- | --- | --- | --- |
| **Inventory code** | **Analytical code** | **Functional**  **description** | **Notes** (macroscopic and stereomicroscopy observations) | **Density**  **(g/cm3)** | **XRD** | **OM in p.l.** | **SEM-EDS** | **Picture (Fig.2)** |
| **JADEITITES:** | | | | | | | | |
| 1327/15 | PIEM82 | Tang | Splintered and bush-hammered | 3.35 | X | X | X | = |
| 1327/17 | = | Tang | Bush-hammered on the sides | 3.33 | X | = | = | = |
| 69232 | PIEM81 | Axehead | Bush-hammered; with omphacite exsolutions | 3.32 | X | X | X | X |
| 69381 | PIEM83 | Tang | Bush-hammered; with omphacite exsolutions | 3.21 | X | X | X | = |
| V5 | = | Splinter | = | 3.39 | X | = | = | = |
| **OMPHACITITES:** | | | | | | | | |
| 1327/4 | = | Splinter | = | 3.44 | X | = | = | = |
| 1327/A1 | = | Splinter | = | 3.39 | X | = | = | = |
| 275 | PIEM79 | Axehead roughout | Splintered but not bush-hammered | 3.40 | X | X | X | = |
| V11 | PIEM89 | Axehead roughout | = | 3.33 | X | X | X | = |
| **MIXED Na-PYROXENITES:** | | | | | | | | |
| 1327/A10 | = | Splinter | = | 3.24 | X | = | = | = |
| **Na-PYROXENE + GARNET ROCKS** | | | | | | | | |
| **Inventory code** | **Analytical code** | **Functional**  **description** | **Notes** (macroscopic and stereomicroscopy observations) | **Density**  **(g/cm3)** | **XRD** | **P.M.** | **SEM-EDS** | **Picture (Fig.2)** |
| **ECLOGITES:** | | | | | | | | |
| 1327/1 | = | Cutting-edge | Splintered and bush-hammered | 3.33 | X | = | = | X |
| 1327/8 | = | Tang | Splintered and bush-hammered | 3.41 | X | = | = | = |
| 1327/12 | PIEM87 | Axehead roughout | Splintered bush-hammered; garnets with atoll-like structure | 3.48 | X | X | = | = |
| 1327/19 | = | Axehead roughout | Splintered and bush-hammered on the sides; banded structure | 3.54 | X | = | = | = |
| 1327/24 | PIEM88 | Splinter | Regressed with abundant glaucophane | 3.27 | X | X | = | = |
| 1327/26 | PIEM77 | Axehead | Fragment, bush-hammered | 3.47 | X | X | X | = |
| 1327/29 | PIEM86 | Axehead | Fragment; Zoisite pseudomorphoses on original lawsonite | 3.42 | X | X | = | = |
| 1327/A2 | PIEM84 | Splinter | Garnets with atoll-like structure | 3.44 | X | X | = | = |
| 1327/A3 | = | Striker | = | 3.38 | X | = | = | = |
| 1327/A5 | = | Axehead | Fragment, bush-hammered | 3.45 | X | = | = | = |
| 1327/A9 | = | Splinter | Banded structure | 3.52 | X | = | = | = |
| 1327/A13 | = | Splinter | = | 3.21 | X | = | = | = |
| 1327/A17 | = | Splinter | = | 3.90 | X | = | = | = |
| 1327/A18 | = | Splinter | = | 3.50 | X | = | = | = |
| 1327/A26 | PIEM76 | Tang | Bush-hammered; regressed with abundant glaucophane | 3.15 | X | X | X | = |
| 69227 | = | Striker | = | 3.46 | X | = | = | = |
| 69230 | = | Axehead roughout | = | 3.41 | X | = | = | = |
| 324 | PIEM80 | Axehead roughout | Splintered, not bush-hammered; garnets atoll-like structured | 3.48 | X | X | X | = |
| **GARNET-OMPHACITITES:** | | | | | | | | |
| 1327/5 | PIEM90 | Splinter | = | 3.40 | X | X | = | = |
| 1327/9 | = | Cutting-edge | Fragment | 3.35 | X | = | = | = |
| 1327/10 | PIEM85 | Axe heel | Fragmented, splintered and bush-hammered | 3.43 | X | X | = | = |
| 1327/13 | PIEM78 | Axehead roughout | Re-used as a striker; zoisite pseudomorphoses on lawsonite | 3.37 | X | X | = | = |
| 1327/14 | PIEM75 | Cutting-edge | Fragment; zoisite pseudomorphoses on original lawsonite | 3.46 | X | X | X | = |
| 1327/36 | PIEM92 | Tang | Splintered | 3.36 | X | X | = | = |
| 1327/37 | PIEM91 | Splinter | = | 3.41 | X | X | X | = |
| 1327/A4 | = | Splinter | = | 3.41 | X | = | = | = |
| **OTHER LITHOLOGIES** | | | | | | | | |
| **Inventory code** | **Analytical code** | **Functional**  **description** | **Notes** (macroscopic and stereomicroscopy observations) | **Density**  **(g/cm3)** | **XRD** | **P.M.** | **SEM-EDS** | **Picture (Fig.2)** |
| **METAGABBRO:** | | | | | | | | |
| 1327/A25 |  | Striker | With zoisite | 3.14 | X | = | = | = |

**Table S2.** Functional description (according to archaeologists) and lithology of the 36 Neolithic implements from the *Rocca di Cavour*, analyzed with XRPD, optical polarizing microscope and SEM-EDS, as indicated.

| ***Rocca di Cavour* archaeologic implements** | | **Pyroxene** | | **Cell parameters** | | | | | **Interplanar distances (dhkl) (Å)** | | | **Pyroxene estimated composition (Giustetto et al., 2008)** | | |
| --- | --- | --- | --- | --- | --- | --- | --- | --- | --- | --- | --- | --- | --- | --- |
| **Invent. code** | **Analyt. code** | **Jadeite** | **Omphacite** | ***a0* (Å)** | ***b0* (Å)** | ***c0* (Å)** | **Volume(Å3)** | **β (°)** | **(-221)** | **(310)** | **(002)** | **Jd (%)** | **Wo+En+Fs(%)** | **Aeg (%)** |
| 1327/1 | = |  | X | 9.610 | 8.798 | 5.260 | 425.70 | 106.82 | 2.970 | 2.896 | 2.517 | 35 | 52 | 13 |
| 1327/4 | = |  | X | 9.540 | 8.677 | 5.262 | 415.65 | 107.40 | 2.949 | 2.863 | 2.511 | 64 | 28 | 8 |
| 1327/5 | PIEM90 |  | X | 9.589 | 8.792 | 5.266 | 424.21 | 107.15 | 2.966 | 2.886 | 2.517 | 40 | 40 | 20 |
| 1327/8 | = |  | X | 9.590 | 8.777 | 5.266 | 424.17 | 106.88 | 2.966 | 2.888 | 2.520 | 35 | 35 | 30 |
| 1327/9 | = | X |  | 9.462 | 8.606 | 5.231 | 406.30 | 107.47 | 2.928 | 2.840 | 2.496 | 87 | 10 | 3 |
|  | X | 9.570 | 8.770 | 2.515 | 421.84 | 106.97 | 2.960 | 2.879 | 2.515 | 47 | 38 | 15 |
| 1327/10 | PIEM85 |  | X | 9.613 | 8.776 | 5.262 | 424.23 | 106.92 | 2.965 | 2.892 | 2.517 | 35 | 50 | 15 |
| 1327/12 | PIEM87 |  | X | 9.544 | 8.695 | 5.262 | 417.22 | 107.16 | 2.951 | 2.870 | 2.514 | 53 | 34 | 13 |
| 1327/14 | PIEM75 |  | X | 9.551 | 8.759 | 5.266 | 421.52 | 107.02 | 2.960 | 2.878 | 2.518 | 45 | 35 | 20 |
| 1327/15 | PIEM82 | X |  | 9.428 | 8.579 | 5.230 | 402.79 | 107.54 | 2.920 | 2.830 | 2.490 | 95 | 0 | 5 |
|  | X | 9.553 | 8.738 | 5.281 | 421.45 | 107.03 | 2.952 | 2.879 | 2.516 | 40 | 40 | 20 |
| 1327/17 | = | X |  | 9.454 | 8.652 | 5.242 | 408.77 | 107.59 | 2.936 | 2.839 | 2.499 | 87 | 7 | 6 |
| 1327/19 | = |  | X | 9.609 | 8.795 | 5.263 | 425.81 | 106.79 | 2.969 | 2.895 | 2.519 | 32 | 45 | 23 |
| 1327/26 | PIEM77 |  | X | 9.575 | 8.764 | 5.253 | 421.85 | 106.86 | 2.959 | 2.883 | 2.513 | 40 | 50 | 10 |
| 1327/29 | PIEM86 |  | X | 9.534 | 8.734 | 5.260 | 418.75 | 107.05 | 2.953 | 2.871 | 2.515 | 52 | 33 | 15 |
| 1327/36 | PIEM92 |  | X | 9.552 | 8.746 | 5.256 | 419.70 | 107.11 | 2.956 | 2.874 | 2.511 | 54 | 40 | 6 |
| 1327/37 | PIEM91 |  | X | 9.560 | 8.748 | 5.279 | 421.85 | 107.16 | 2.959 | 2.875 | 2.523 | 32 | 10 | 58 |
| 1327/A1 | = |  | X | 9.546 | 8.701 | 5.271 | 418.00 | 107.30 | 2.954 | 2.868 | 2.517 | 50 | 24 | 26 |
| 1327/A2 | PIEM84 |  | X | 9.521 | 8.688 | 5.267 | 416.21 | 107.21 | 2.947 | 2.862 | 2.516 | 58 | 12 | 30 |
| 1327/A3 | = |  | = | 9.570 | 8.766 | 5.272 | 422.72 | 107.09 | 2.961 | 2.882 | 2.521 | 34 | 26 | 40 |
| 1327/A4 | = |  | X | 9.564 | 8.773 | 5.256 | 419.22 | 107.25 | 2.955 | 2.866 | 2.512 | 60 | 30 | 10 |
| 1327/A5 | = | X |  | 9.472 | 8.610 | 2.523 | 408.15 | 107.69 | 2.937 | 2.838 | 2.502 | 87 | 6 | 7 |
| 1327/A10 | = | X |  | 9.460 | 8.598 | 5.230 | 405.91 | 107.50 | 2.928 | 2.839 | 2.496 | 88 | 7 | 5 |
|  | X | 9.569 | 8.764 | 5.261 | 422.14 | 106.93 | 2.960 | 2.880 | 2.517 | 44 | 35 | 21 |
| 1327/A13 | = | X |  | 9.486 | 8.631 | 5.245 | 409.73 | 107.43 | 2.942 | 2.850 | 2.503 | 78 | 17 | 5 |
| 1327/A17 | = |  | X | 9.561 | 8.769 | 5.269 | 421.40 | 107.05 | 2.958 | 2.879 | 2.520 | 38 | 25 | 37 |
| 1327/A18 | = |  | X | 9.517 | 8.756 | 5.266 | 419.64 | 107.02 | 2.956 | 2.865 | 2.518 | 49 | 17 | 34 |
| 275 | PIEM79 |  | X | 9.584 | 8.767 | 5.254 | 422.41 | 106.88 | 2.962 | 2.887 | 2.516 | 42 | 45 | 13 |
| 324 | PIEM80 | X |  | 9.487 | 8.617 | 5.261 | 409.89 | 107.62 | 2.904 | 2.831 | 2.488 | 95 | 5 | 0 |
|  | X | 9.586 | 8.765 | 5.268 | 423.40 | 106.88 | 2.965 | 2.861 | 2.514 | 57 | 22 | 21 |
| 69227 | = | X |  | 9.486 | 8.621 | 5.260 | 409.95 | 107.66 | 2.939 | 2.846 | 2.506 | 77 | 17 | 6 |
|  | X | 9.567 | 8.752 | 5.274 | 422.12 | 107.09 | 2.959 | 2.879 | 2.521 | 36 | 23 | 41 |
| 69230 | = |  | X | 9.535 | 8.685 | 5.256 | 415.36 | 107.38 | 2.950 | 2.864 | 2.511 | 61 | 30 | 9 |
| V5 | = | X |  | 9.455 | 8.595 | 5.234 | 405.71 | 107.51 | 2.929 | 2.837 | 2.496 | 89 | 6 | 5 |
|  | X | 9.563 | 8.701 | 5.257 | 417.71 | 107.26 | 2.949 | 2.864 | 2.510 | 62 | 30 | 8 |
| V11 | PIEM89 |  | X | 9.636 | 8.816 | 5.261 | 428.21 | 106.63 | 2.973 | 2.905 | 2.520 | 26 | 53 | 21 |
| **High Po valley and alluvial geologic samples** | | **Pyroxene** | | **Cell parameters** | | | | | **Interplanar distances (dhkl) (Å)** | | | **Pyroxene estimated composition (Giustetto et al., 2008)** | | |
| **Analytical code** | | **Jadeite** | **Omphacite** | ***a0* (Å)** | ***b0* (Å)** | ***c0* (Å)** | **Volume(Å3)** | **β (°)** | **(-221)** | **(310)** | **(002)** | **Jd %** | **Wo+En+Fs%** | **Aeg %** |
| OF2758 | |  | X | 9.527 | 8.734 | 5.266 | 419.55 | 106.77 | 2.952 | 2.871 | 2.514 | 52 | 35 | 13 |
| OF2760 | |  | X | 9.633 | 8.812 | 5.263 | 427.66 | 106.81 | 2.974 | 2.899 | 2.519 | 30 | 50 | 20 |
| OF2761 | |  | X | 9.573 | 8.784 | 5.253 | 423.04 | 106.75 | 2.963 | 2.886 | 2.515 | 43 | 46 | 11 |
| OF2764 | |  | X | 9.566 | 8.781 | 5.266 | 423.23 | 106.89 | 2.961 | 2.883 | 2.520 | 35 | 30 | 35 |
| OF2767 | | X |  | 9.461 | 8.594 | 5.240 | 406.33 | 107.52 | 2.931 | 2.839 | 2.499 | 87 | 7 | 6 |
| OF2768 | |  | X | 9.601 | 8.767 | 5.256 | 423.25 | 106.93 | 2.964 | 2.890 | 2.514 | 41 | 52 | 7 |
| OF2772 | | X |  | 9.444 | 8.587 | 5.221 | 403.92 | 107.16 | 2.921 | 2.836 | 2.491 | 92 | 6 | 2 |
| OF2774 | | X |  | 9.461 | 8.590 | 5.233 | 405.62 | 107.52 | 2.928 | 2.836 | 2.496 | 91 | 5 | 4 |
| OF2780 | |  | X | 9.583 | 8.765 | 5.268 | 423.40 | 106.88 | 2.965 | 2.889 | 2.521 | 32 | 33 | 35 |
| OF2784 | | X |  | 9.480 | 8.625 | 5.245 | 408.84 | 107.58 | 2.935 | 2.845 | 2.500 | 83 | 12 | 5 |
| OF2785 | |  | X | 9.602 | 8.766 | 5.265 | 423.63 | 107.07 | 2.965 | 2.887 | 2.517 | 42 | 45 | 13 |
| OF2788 | | X |  | 9.453 | 8.603 | 5.233 | 405.93 | 107.50 | 2.921 | 2.839 | 2.497 | 88 | 7 | 5 |

**Table S3.** Cell parameters, interplanar distances of representative reflections and estimated average chemistry for pyroxenes (jadeite and/or omphacite, based on the compositional grid of Giustetto et al., 2008) based on X-ray diffraction data collected on 30 *greenstone* implements from the *Rocca di Cavour* archaeological site and 12 geologic implements from the high Po valley and related alluvial sediments.

| ***Approximate***  ***mineral modal***  ***amounts* (*vol.*** %)< 5 vol. % 5 - 20 vol. % 20 - 60 vol. % > 60 vol. | | | | | | | | | | | | | | | | | | | | |
| --- | --- | --- | --- | --- | --- | --- | --- | --- | --- | --- | --- | --- | --- | --- | --- | --- | --- | --- | --- | --- |
| **Mineralss** | | **jadeite** | **omphacite** | **garnet** | **glaucophane** | **quartz** | **zoisite/**  **clinozoisite** | **actinolite** | **mica** | **clinochlore** | **albite** | **rutile** | **ilmenite** | **titanite** | **allanite** | **zircon** | **apatite** | **pyrite** | **hematite** | **Notes** |
| **Invent. code** | **Analyt. code** |
| ***Na-PYROXENE ROCKS*** | | | | | | | | | | | | | | | | | | | | |
| ***JADEITITE*** | | | | | | | | | | | | | | | | | | | | |
| 1327/15 | PIEM82 |  |  |  |  |  |  |  |  |  |  |  |  |  |  |  |  |  |  | Omphacite exsolutions in Jadeite |
| 69232 | PIEM81 |  |  |  |  |  |  |  |  |  |  |  |  |  |  |  |  |  |  | Omphacite exsolutions in Jadeite |
| 69381 | PIEM83 |  |  |  |  |  |  |  |  |  |  |  |  |  |  |  |  |  |  | Marked zoning of jadeite crystals |
| ***OMPHACITITE*** | | | | | | | | | | | | | | | | | | | | |
| 275 | PIEM79 |  |  |  |  |  |  |  |  |  |  |  |  |  |  |  |  |  |  | Micro-crystals of omphacite |
| V11 | PIEM89 |  |  |  |  |  |  |  |  |  |  |  |  |  |  |  |  |  |  | Zoned omphacite crystals |
| ***Na-PYROXENE + GARNET ROCKS*** | | | | | | | | | | | | | | | | | | | | |
| ***ECLOGITE*** | | | | | | | | | | | | | | | | | | | | |
| 1327/12 | PIEM87 |  |  |  |  |  |  |  |  |  |  |  |  |  |  |  |  |  |  | Atoll garnets; slight greenschist-facies retrogression |
| 1327/24 | PIEM88 |  |  |  |  |  |  |  |  |  |  |  |  |  |  |  |  |  |  | **= = =** |
| 1327/26 | PIEM77 |  |  |  |  |  |  |  |  |  |  |  |  |  |  |  |  |  |  | Inclusions of rutile and titanite in omphacite crystals |
| 1327/29 | PIEM86 |  |  |  |  |  |  |  |  |  |  |  |  |  |  |  |  |  |  | Zoisite/white mica pseudomorphs after lawsonite |
| 1327/A2 | PIEM84 |  |  |  |  |  |  |  |  |  |  |  |  |  |  |  |  |  |  | Atoll-like garnets |
| 1327/A26 | PIEM76 |  |  |  |  |  |  |  |  |  |  |  |  |  |  |  |  |  |  | = = = |
| 324 | PIEM80 |  |  |  |  |  |  |  |  |  |  |  |  |  |  |  |  |  |  | Atoll-like garnets;slight greenschist facies retrogression |
| ***GARNET-OMPHACITITE*** | | | | | | | | | | | | | | | | | | | | |
| 1327/5 | PIEM90 |  |  |  |  |  |  |  |  |  |  |  |  |  |  |  |  |  |  | Euhedral garnet porphyroblasts |
| 1327/10 | PIEM85 |  |  |  |  |  |  |  |  |  |  |  |  |  |  |  |  |  |  | Subhedral garnet porphyroblasts |
| 1327/13 | PIEM78 |  |  |  |  |  |  |  |  |  |  |  |  |  |  |  |  |  |  | Zoisite/white mica pseudomorphs after lawsonite |
| 1327/14 | PIEM75 |  |  |  |  |  |  |  |  |  |  |  |  |  |  |  |  |  |  | Zoisite/white mica pseudomorphs after lawsonite |
| 1327/36 | PIEM92 |  |  |  |  |  |  |  |  |  |  |  |  |  |  |  |  |  |  | = = = |
| 1327/37 | PIEM91 |  |  |  |  |  |  |  |  |  |  |  |  |  |  |  |  |  |  | = = = |

**Table S4.** Approximate mineral modal composition of 18 *greenstone* tools from the *Rocca di Cavour* site, obtained by combining X-ray powder diffraction, optical polarized-light microscopy and SEM-EDS data (if available).

| ***Approximate***  ***mineral modal***  ***amounts* (*vol.*** %)< 5 vol. % 5 - 20 vol. % 20 - 60 vol. % > 60 vol. % | | | | | | | | | | | | | | | | | | | |
| --- | --- | --- | --- | --- | --- | --- | --- | --- | --- | --- | --- | --- | --- | --- | --- | --- | --- | --- | --- |
| **Mineralss** | **jadeite** | **omphacite** | **garnet** | **glaucophane** | **quartz** | **zoisite/**  **clinozoisite** | **actinolite** | **mica** | **clinochlore** | **albite** | **rutile** | **ilmenite** | **titanite** | **allanite** | **zircon** | **apatite** | **pyrite** | **hematite** | **Notes** |
| **Analytical code** |
| ***Na-PYROXENE ROCKS*** | | | | | | | | | | | | | | | | | | | |
| ***JADEITITES*** | | | | | | | | | | | | | | | | | | | |
| OF2772 |  |  |  |  |  |  |  |  |  |  |  |  |  |  |  |  |  |  | Granoblastic structure; mica is biotite |
| OF2774 |  |  |  |  |  |  |  |  |  |  |  |  |  |  |  |  |  |  | Locally porphyroblastic structure |
| OF2776 |  |  |  |  |  |  |  |  |  |  |  |  |  |  |  |  |  |  | Slightly regressed in greenschist facies |
| OF2788 |  |  |  |  |  |  |  |  |  |  |  |  |  |  |  |  |  |  | Granoblastic structure; mica is biotite |
| ***OMPHACITITES*** | | | | | | | | | | | | | | | | | | | |
| OF2760 |  |  |  |  |  |  |  |  |  |  |  |  |  |  |  |  |  |  | Fine grained; |
| OF2763 |  |  |  |  |  |  |  |  |  |  |  |  |  |  |  |  |  |  | Foliation marked by white mica (phengite) |
| ***Na-PYROXENE + GARNET ROCKS*** | | | | | | | | | | | | | | | | | | | |
| ***ECLOGITE*** | | | | | | | | | | | | | | | | | | | |
| OF2758 |  |  |  |  |  |  |  |  |  |  |  |  |  |  |  |  |  |  | Atoll-garnets; greenschist-f. retrogression along fractures |
| OF2764 |  |  |  |  |  |  |  |  |  |  |  |  |  |  |  |  |  |  | Foliation defined by rutile aggregates |
| OF2765 |  |  |  |  |  |  |  |  |  |  |  |  |  |  |  |  |  |  | Alternating Omph- and Epidote-rich layers |
| OF2768 |  |  |  |  |  |  |  |  |  |  |  |  |  |  |  |  |  |  | = = = |
| OF2771 |  |  |  |  |  |  |  |  |  |  |  |  |  |  |  |  |  |  | Atoll-like garnets; fractures regressed greenschist facies |
| OF2775 |  |  |  |  |  |  |  |  |  |  |  |  |  |  |  |  |  |  | Zoisite/white mica pseudomorph after lawsonite |
| OF2779 |  |  |  |  |  |  |  |  |  |  |  |  |  |  |  |  |  |  | Opaques ore mark foliation; G-f retrogression |
| OF2780 |  |  |  |  |  |  |  |  |  |  |  |  |  |  |  |  |  |  | Zoned Omph; greenschist-facies retrogression |
| OF2781 |  |  |  |  |  |  |  |  |  |  |  |  |  |  |  |  |  |  | White mica is phengite |
| OF2785 |  |  |  |  |  |  |  |  |  |  |  |  |  |  |  |  |  |  | Zoisite/white mica pseudomorphs after lawsonite |

**Table S5.** Mineralogical composition of 16 *greenstone s.s.* samples, collected during the geologic prospection of primary outcrops and alluvial sediments in the upper Po valley or from the Quaternary alluvial sediments of the Po river, obtained by combining X-ray powder diffraction, optical polarized-light microscopy and SEM-EDS (when available).

**ARCHAEOLOGICAL IMPLEMENTS**

Selected spot chemical analyses of clinopyroxenes and garnets (if present) by EDS.

**Na-PYROXENITE**

**Jadeitite**

Sample (thin section): **PIEM81**

| **Clinopyroxenes** | | | | | | |  | |  | |  | |  | |  | |
| --- | --- | --- | --- | --- | --- | --- | --- | --- | --- | --- | --- | --- | --- | --- | --- | --- |
| **Oxides (wt %)** | **1** | **2** | **3** | **4** | | **5** | | **6** | | **7** | | **8** | | **9** | | **10** |
| SiO2 | 58.34 | 58.58 | 55.96 | 57.89 | | 56.15 | | 57.21 | | 55.83 | | 57.69 | | 55.00 | | 57.59 |
| TiO2 | 0.01 | 0.04 | 0.83 | 0.01 | | 0.34 | | 0.01 | | 0.73 | | 0.16 | | 0.49 | | 0.01 |
| Cr2O3 | 0.09 | 0.01 | 0.01 | 0.01 | | 0.09 | | 0.24 | | 0.01 | | 0.01 | | 0.01 | | 0.13 |
| Al2O3 | 24.98 | 24.80 | 11.43 | 24.40 | | 11.33 | | 22.38 | | 12.32 | | 24.02 | | 9.84 | | 24.42 |
| Fe2O3 | 0.41 | 0.71 | 5.21 | 0.42 | | 5.61 | | 1.80 | | 5.63 | | 0.87 | | 3.78 | | 0.52 |
| FeO | 0.00 | 0.00 | 0.13 | 0.00 | | 0.45 | | 0.00 | | 0.72 | | 0.00 | | 1.59 | | 0.00 |
| MnO | 0.06 | 0.01 | 0.01 | 0.01 | | 0.01 | | 0.01 | | 0.01 | | 0.01 | | 0.25 | | 0.25 |
| MgO | 0.06 | 0.49 | 6.55 | 0.37 | | 6.89 | | 1.01 | | 6.41 | | 0.62 | | 8.06 | | 0.25 |
| NiO | 0.00 | 0.00 | 0.00 | 0.00 | | 0.00 | | 0.00 | | 0.00 | | 0.00 | | 0.00 | | ‘.00 |
| CaO | 0.17 | 0.51 | 9.38 | 0.22 | | 9.92 | | 1.82 | | 9.00 | | 1.09 | | 12.53 | | 0.40 |
| Na2O | 15.42 | 15.93 | 9.61 | 15.61 | | 9.36 | | 14.57 | | 9.97 | | 15.12 | | 7.68 | | 15.41 |
| K2O | 0.01 | 0.01 | 0.01 | 0.01 | | 0.01 | | 0.01 | | 0.01 | | 0.05 | | 0.01 | | 0.01 |
| **Total** | 99.55 | 101.09 | 99.12 | 98.95 | | 100.16 | | 99.06 | | 100.64 | | 99.64 | | 99.24 | | 98.99 |
| **Cations (based on 6 oxygens)** | | | | | | |  | |  | |  | |  | |  | |
| Si | 1.983 | 1.971 | 2.016 | 1.983 | | 2.011 | | 1.982 | | 1.991 | | 1.972 | | 1.995 | | 1.976 |
| Ti | 0.00 | 0.001 | 0.023 | 0.00 | | 0.009 | | 0.00 | | 0.020 | | 0.004 | | 0.013 | | 0.00 |
| Cr | 0.002 | 0.00 | 0.00 | 0.00 | | 0.003 | | 0.007 | | 0.00 | | 0.00 | | 0.00 | | 0.004 |
| Al | 1.001 | 0.983 | 0.485 | 0.985 | | 0.478 | | 0.914 | | 0.518 | | 0.968 | | 0.421 | | 0.988 |
| Fe3+ | 0.011 | 0.018 | 0.141 | 0.011 | | 0.151 | | 0.047 | | 0.151 | | 0.022 | | 0.103 | | 0.014 |
| Fe2+ | 0.00 | 0.00 | 0.004 | 0.00 | | 0.013 | | 0.00 | | 0.022 | | 0.00 | | 0.048 | | 0.00 |
| Mn | 0.002 | 0.00 | 0.00 | 0.00 | | 0.00 | | 0.00 | | 0.00 | | 0.00 | | 0.008 | | 0.007 |
| Mg | 0.003 | 0.025 | 0.352 | 0.019 | | 0.368 | | 0.052 | | 0.341 | | 0.032 | | 0.436 | | 0.013 |
| Ni | 0.00 | 0.00 | 0.00 | 0.00 | | 0.00 | | 0.00 | | 0.00 | | 0.00 | | 0.00 | | 0.00 |
| Ca | 0.006 | 0.018 | 0.362 | 0.008 | | 0.381 | | 0.068 | | 0.344 | | 0.040 | | 0.487 | | 0.015 |
| Na | 1.016 | 1.039 | 0.671 | 1.037 | | 0.650 | | 0.978 | | 0.689 | | 1.002 | | 0.540 | | 1.025 |
| K | 0.00 | 0.00 | 0.001 | 0.00 | | 0.001 | | 0.00 | | 0.001 | | 0.002 | | 0.001 | | 0.00 |
| **End-members** | | | | |  | |  | |  | |  | |  | |  | |
| Diopside | 0.002 | 0.017 | 0.358 | 0.007 | | 0.367 | | 0.060 | | 0.319 | | 0.035 | | 0.429 | | 0.007 |
| Wollastonite | 0.002 | 0.009 | 0.181 | 0.004 | | 0.190 | | 0.030 | | 0.170 | | 0.018 | | 0.242 | | 0.005 |
| Enstatite | 0.002 | 0.012 | 0.176 | 0.009 | | 0.184 | | 0.026 | | 0.170 | | 0.016 | | 0.218 | | 0.006 |
| Ferrosilite | 0.00 | 0.00 | 0.002 | 0.00 | | 0.007 | | 0.00 | | 0.011 | | 0.00 | | 0.024 | | 0.00 |
| Pyroxmangite | 0.00 | 0.00 | 0.00 | 0.00 | | 0.00 | | 0.00 | | 0.00 | | 0.00 | | 0.004 | | 0.004 |
| CaAl2SiO6 | 0.00 | 0.00 | 0.00 | 0.00 | | 0.00 | | 0.00 | | 0.00 | | 0.00 | | 0.00 | | 0.00 |
| CaFe2SiO6 | 0.00 | 0.00 | 0.00 | 0.00 | | 0.00 | | 0.00 | | 0.00 | | 0.00 | | 0.00 | | 0.00 |
| CaCr2SiO6 | 0.00 | 0.00 | 0.00 | 0.00 | | 0.00 | | 0.007 | | 0.00 | | 0.00 | | 0.00 | | 0.004 |
| Aegirine | 0.011 | 0.018 | 0.141 | 0.011 | | 0.151 | | 0.047 | | 0.151 | | 0.022 | | 0.103 | | 0.013 |
| Jadeite | 0.983 | 0.954 | 0.485 | 0.967 | | 0.478 | | 0.895 | | 0.508 | | 0.939 | | 0.416 | | 0.963 |
| CaTiAl2O6 | 0.00 | 0.001 | 0.00 | 0.00 | | 0.00 | | 0.00 | | 0.005 | | 0.004 | | 0.003 | | 0.00 |

**Table S6**

Sample (thin section): **PIEM82**

| **Clinopyroxenes** | | | | | | |  | |  | |  | |  | |  | |
| --- | --- | --- | --- | --- | --- | --- | --- | --- | --- | --- | --- | --- | --- | --- | --- | --- |
| **Oxides (wt %)** | **1** | **2** | **3** | **4** | | **5** | | **6** | | **7** | | **8** | | **9** | | **10** |
| SiO2 | 58.84 | 56.31 | 58.88 | 55.82 | | 59.21 | | 55.88 | | 58.58 | | 55.98 | | 58.79 | | 56.03 |
| TiO2 | 0.07 | 0.11 | 0.01 | 0.21 | | 0.05 | | 0.35 | | 0.16 | | 0.22 | | 0.15 | | 0.26 |
| Cr2O3 | 0.09 | 0.26 | 0.07 | 0.01 | | 0.01 | | 0.01 | | 0.01 | | 0.01 | | 0.01 | | 0.13 |
| Al2O3 | 24.26 | 11.52 | 24.08 | 9.35 | | 24.40 | | 9.85 | | 24.17 | | 12.46 | | 24.24 | | 12.89 |
| Fe2O3 | 0.64 | 6.71 | 1.38 | 7.66 | | 1.33 | | 5.91 | | 1.24 | | 6.36 | | 0.70 | | 6.02 |
| FeO | 0.00 | 0.11 | 0.00 | 0.00 | | 0.00 | | 1.55 | | 0.00 | | 0.00 | | 0.00 | | 0.79 |
| MnO | 0.01 | 0.10 | 0.01 | 0.01 | | 0.03 | | 0.11 | | 0.03 | | 0.21 | | 0.11 | | 0.23 |
| MgO | 0.24 | 6.76 | 0.59 | 7.86 | | 0.42 | | 7.59 | | 0.46 | | 5.64 | | 0.16 | | 5.47 |
| NiO | 0.00 | 0.00 | 0.00 | 0.00 | | 0.00 | | 0.00 | | 0.00 | | 0.00 | | 0.00 | | 0.00 |
| CaO | 0.45 | 9.48 | 0.81 | 11.71 | | 0.52 | | 11.69 | | 0.69 | | 8.42 | | 0.57 | | 8.25 |
| Na2O | 15.23 | 9.79 | 15.46 | 8.92 | | 15.33 | | 8.54 | | 15.72 | | 10.21 | | 15.44 | | 10.42 |
| K2O | 0.01 | 0.01 | 0.01 | 0.01 | | 0.04 | | 0.01 | | 0.05 | | 0.01 | | 0.01 | | 0.01 |
| **Total** | 99.84 | 101.05 | 101.30 | 101.56 | | 101.25 | | 101.48 | | 101.11 | | 99.52 | | 100.18 | | 100.50 |
| **Cations (based on 6 oxygens)** | | | | | | |  | |  | |  | |  | |  | |
| Si | 1.996 | 2.006 | 1.982 | 2.003 | | 1.987 | | 2.000 | | 1.977 | | 2.016 | | 1.992 | | 2.003 |
| Ti | 0.002 | 0.003 | 0.00 | 0.006 | | 0.001 | | 0.009 | | 0.004 | | 0.006 | | 0.004 | | 0.007 |
| Cr | 0.002 | 0.007 | 0.002 | 0.00 | | 0.00 | | 0.00 | | 0.00 | | 0.00 | | 0.00 | | 0.004 |
| Al | 0.970 | 0.484 | 0.956 | 0.396 | | 0.966 | | 0.415 | | 0.961 | | 0.529 | | 0.968 | | 0.543 |
| Fe3+ | 0.017 | 0.180 | 0.035 | 0.207 | | 0.034 | | 0.159 | | 0.032 | | 0.172 | | 0.018 | | 0.162 |
| Fe2+ | 0.00 | 0.003 | 0.00 | 0.00 | | 0.00 | | 0.046 | | 0.00 | | 0.00 | | 0.00 | | 0.024 |
| Mn | 0.00 | 0.003 | 0.00 | 0.00 | | 0.001 | | 0.003 | | 0.001 | | 0.006 | | 0.003 | | 0.007 |
| Mg | 0.012 | 0.359 | 0.030 | 0.421 | | 0.021 | | 0.405 | | 0.023 | | 0.303 | | 0.008 | | 0.291 |
| Ni | 0.00 | 0.00 | 0.00 | 0.00 | | 0.00 | | 0.00 | | 0.00 | | 0.00 | | 0.00 | | 0.00 |
| Ca | 0.016 | 0.362 | 0.029 | 0.450 | | 0.019 | | 0.448 | | 0.025 | | 0.325 | | 0.021 | | 0.316 |
| Na | 1.002 | 0.676 | 1.009 | 0.621 | | 0.999 | | 0.593 | | 1.029 | | 0.713 | | 1.014 | | 0.722 |
| K | 0.00 | 0.001 | 0.00 | 0.001 | | 0.02 | | 0.001 | | 0.002 | | 0.001 | | 0.00 | | 0.001 |
| **End-members** | | | | |  | |  | |  | |  | |  | |  | |
| Diopside | 0.014 | 0.356 | 0.027 | 0.450 | | 0.017 | | 0.399 | | 0.020 | | 0.318 | | 0.012 | | 0.286 |
| Wollastonite | 0.007 | 0.181 | 0.014 | 0.225 | | 0.009 | | 0.224 | | 0.010 | | 0.162 | | 0.08 | | 0.158 |
| Enstatite | 0.006 | 0.179 | 0.015 | 0.210 | | 0.011 | | 0.202 | | 0.012 | | 0.151 | | 0.04 | | 0.146 |
| Ferrosilite | 0.00 | 0.002 | 0.00 | 0.00 | | 0.00 | | 0.023 | | 0.00 | | 0.00 | | 0.00 | | 0.012 |
| Pyroxmangite | 0.00 | 0.002 | 0.00 | 0.00 | | 0.00 | | 0.002 | | 0.00 | | 0.003 | | 0.002 | | 0.003 |
| CaAl2SiO6 | 0.00 | 0.00 | 0.00 | 0.00 | | 0.00 | | 0.00 | | 0.00 | | 0.00 | | 0.00 | | 0.00 |
| CaFe2SiO6 | 0.00 | 0.00 | 0.00 | 0.00 | | 0.00 | | 0.00 | | 0.00 | | 0.00 | | 0.00 | | 0.00 |
| CaCr2SiO6 | 0.00 | 0.00 | 0.002 | 0.00 | | 0.00 | | 0.00 | | 0.00 | | 0.00 | | 0.00 | | 0.00 |
| Aegirine | 0.016 | 0.180 | 0.035 | 0.207 | | 0.034 | | 0.159 | | 0.032 | | 0.172 | | 0.018 | | 0.162 |
| Jadeite | 0.966 | 0.484 | 0.938 | 0.395 | | 0.953 | | 0.415 | | 0.938 | | 0.529 | | 0.959 | | 0.543 |
| CaTiAl2O6 | 0.002 | 0.00 | 0.00 | 0.00 | | 0.001 | | 0.00 | | 0.004 | | 0.00 | | 0.004 | | 0.00 |

**Table S7**

Sample (thin section): **PIEM83**

| **Clinopyroxenes** | | | | | | |  | |  | |  | |  | |  | |
| --- | --- | --- | --- | --- | --- | --- | --- | --- | --- | --- | --- | --- | --- | --- | --- | --- |
| **Oxides (wt %)** | **1** | **2** | **3** | **4** | | **5** | | **6** | | **7** | | **8** | | **9** | | **10** |
| SiO2 | 54.11 | 55.11 | 58.20 | 54.05 | | 56.40 | | 56.86 | | 59.60 | | 53.64 | | 58.84 | | 57.03 |
| TiO2 | 0.08 | 0.70 | 0.01 | 0.48 | | 0.35 | | 0.01 | | 0.06 | | 0.55 | | 0.10 | | 0.61 |
| Cr2O3 | 0.01 | 0.15 | 0.51 | 0.19 | | 0.01 | | 0.01 | | 0.01 | | 0.01 | | 0.03 | | 0.01 |
| Al2O3 | 7.62 | 10.00 | 21.24 | 4.52 | | 11.23 | | 11.31 | | 24.96 | | 5.08 | | 25.28 | | 13.09 |
| Fe2O3 | 17.31 | 8.10 | 4.95 | 14.92 | | 7.73 | | 5.48 | | 0.61 | | 16.67 | | 0.44 | | 6.52 |
| FeO | 0.74 | 3.31 | 0.00 | 1.51 | | 0.93 | | 0.00 | | 0.00 | | 1.43 | | 0.00 | | 2.28 |
| MnO | 0.33 | 0.20 | 0.16 | 0.56 | | 0.05 | | 0.34 | | 0.05 | | 0.31 | | 0.18 | | 0.28 |
| MgO | 3.70 | 5.08 | 1.09 | 6.49 | | 6.17 | | 7.78 | | 0.53 | | 5.58 | | 0.24 | | 4.69 |
| NiO | 0.00 | 0.00 | 0.00 | 0.00 | | 0.00 | | 0.00 | | 0.00 | | 0.00 | | 0.00 | | 0.00 |
| CaO | 6.22 | 8.68 | 1.89 | 10.53 | | 9.10 | | 11.55 | | 0.51 | | 9.00 | | 0.33 | | 6.77 |
| Na2O | 11.41 | 9.82 | 14.58 | 8.98 | | 10.09 | | 9.04 | | 16.03 | | 9.95 | | 16.19 | | 10.96 |
| K2O | 0.01 | 0.01 | 0.01 | 0.01 | | 0.02 | | 0.01 | | 0.01 | | 0.06 | | 0.01 | | 0.01 |
| **Total** | 101.54 | 101.16 | 102.64 | 102.23 | | 102.08 | | 102.39 | | 102.37 | | 102.28 | | 101.64 | | 102.25 |
| **Cations (based on 6 oxygens)** | | | | | | |  | |  | |  | |  | |  | |
| Si | 2.042 | 2.009 | 1.982 | 2.031 | | 2.007 | | 1.996 | | 1.978 | | 2.027 | | 1.967 | | 2.012 |
| Ti | 0.002 | 0.019 | 0.00 | 0.014 | | 0.009 | | 0.00 | | 0.002 | | 0.016 | | 0.003 | | 0.016 |
| Cr | 0.00 | 0.004 | 0.014 | 0.006 | | 0.00 | | 0.00 | | 0.00 | | 0.00 | | 0.001 | | 0.00 |
| Al | 0.339 | 0.430 | 0.852 | 0.200 | | 0.471 | | 0.468 | | 0.976 | | 0.226 | | 0.996 | | 0.544 |
| Fe3+ | 0.492 | 0.222 | 0.127 | 0.422 | | 0.207 | | 0.145 | | 0.015 | | 0.474 | | 0.011 | | 0.173 |
| Fe2+ | 0.024 | 0.101 | 0.00 | 0.047 | | 0.028 | | 0.00 | | 0.00 | | 0.045 | | 0.00 | | 0.067 |
| Mn | 0.011 | 0.006 | 0.005 | 0.018 | | 0.002 | | 0.010 | | 0.001 | | 0.010 | | 0.005 | | 0.008 |
| Mg | 0.208 | 0.276 | 0.055 | 0.364 | | 0.327 | | 0.407 | | 0.026 | | 0.314 | | 0.012 | | 0.247 |
| Ni | 0.00 | 0.00 | 0.00 | 0.00 | | 0.00 | | 0.00 | | 0.00 | | 0.00 | | 0.00 | | 0.00 |
| Ca | 0.252 | 0.339 | 0.069 | 0.424 | | 0.347 | | 0.435 | | 0.018 | | 0.365 | | 0.012 | | 0.256 |
| Na | 0.835 | 0.694 | 0.963 | 0.654 | | 0.696 | | 0.615 | | 1.031 | | 0.729 | | 1.050 | | 0.750 |
| K | 0.001 | 0.001 | 0.00 | 0.001 | | 0.001 | | 0.00 | | 0.00 | | 0.003 | | 0.00 | | 0.001 |
| **End-members** | | | | |  | |  | |  | |  | |  | |  | |
| Diopside | 0.216 | 0.244 | 0.051 | 0.359 | | 0.319 | | 0.423 | | 0.016 | | 0.310 | | 0.006 | | 0.196 |
| Wollastonite | 0.126 | 0.170 | 0.027 | 0.212 | | 0.174 | | 0.217 | | 0.008 | | 0.182 | | 0.004 | | 0.128 |
| Enstatite | 0.104 | 0.138 | 0.028 | 0.182 | | 0.164 | | 0.204 | | 0.013 | | 0.157 | | 0.006 | | 0.123 |
| Ferrosilite | 0.012 | 0.050 | 0.00 | 0.024 | | 0.014 | | 0.00 | | 0.00 | | 0.023 | | 0.00 | | 0.034 |
| Pyroxmangite | 0.005 | 0.003 | 0.002 | 0.009 | | 0.001 | | 0.005 | | 0.001 | | 0.005 | | 0.003 | | 0.004 |
| CaAl2SiO6 | 0.00 | 0.00 | 0.00 | 0.00 | | 0.00 | | 0.00 | | 0.00 | | 0.00 | | 0.00 | | 0.00 |
| CaFe2SiO6 | 0.00 | 0.00 | 0.00 | 0.00 | | 0.00 | | 0.00 | | 0.00 | | 0.00 | | 0.00 | | 0.00 |
| CaCr2SiO6 | 0.00 | 0.00 | 0.014 | 0.00 | | 0.00 | | 0.00 | | 0.00 | | 0.00 | | 0.001 | | 0.00 |
| Aegirine | 0.492 | 0.222 | 0.127 | 0.422 | | 0.207 | | 0.145 | | 0.015 | | 0.474 | | 0.011 | | 0.173 |
| Jadeite | 0.339 | 0.430 | 0.834 | 0.200 | | 0.471 | | 0.464 | | 0.954 | | 0.226 | | 0.963 | | 0.544 |
| CaTiAl2O6 | 0.00 | 0.00 | 0.00 | 0.00 | | 0.00 | | 0.00 | | 0.001 | | 0.00 | | 0.003 | | 0.00 |

**Table S8**

**Omphacitite**

Sample (thin section): **PIEM79**

| **Clinopyroxenes** | | | | | | |  | |  | |  | |  | |  | |
| --- | --- | --- | --- | --- | --- | --- | --- | --- | --- | --- | --- | --- | --- | --- | --- | --- |
| **Oxides (wt %)** | **1** | **2** | **3** | **4** | | **5** | | **6** | | **7** | | **8** | | **9** | | **10** |
| SiO2 | 54.10 | 54.47 | 55.17 | 55.57 | | 55.98 | | 55.45 | | 55.99 | | 55.64 | | 55.78 | | 55.56 |
| TiO2 | 0.01 | 0.27 | 0.06 | 0.21 | | 0.09 | | 0.13 | | 0.01 | | 0.08 | | 0.03 | | 0.01 |
| Cr2O3 | 0.13 | 0.09 | 0.01 | 0.11 | | 0.01 | | 0.01 | | 0.01 | | 0.01 | | 0.25 | | 0.09 |
| Al2O3 | 8.61 | 9.38 | 9.27 | 8.51 | | 9.60 | | 9.67 | | 9.81 | | 9.46 | | 9.01 | | 10.11 |
| Fe2O3 | 7.23 | 6.84 | 7.53 | 7.46 | | 7.75 | | 7.82 | | 7.40 | | 7.88 | | 7.46 | | 7.28 |
| FeO | 1.60 | 1.31 | 1.99 | 1.29 | | 0.25 | | 1.19 | | 2.06 | | 1.09 | | 1.92 | | 1.37 |
| MnO | 0.25 | 0.01 | 0.07 | 0.15 | | 0.17 | | 0.30 | | 0.01 | | 0.01 | | 0.01 | | 0.01 |
| MgO | 7.54 | 7.43 | 7.29 | 7.62 | | 7.04 | | 6.80 | | 6.91 | | 7.10 | | 7.38 | | 6.79 |
| NiO | 0.00 | 0.00 | 0.00 | 0.00 | | 0.00 | | 0.00 | | 0.00 | | 0.00 | | 0.00 | | 0.00 |
| CaO | 11.40 | 11.17 | 10.86 | 12.23 | | 11.30 | | 10.49 | | 10.60 | | 10.72 | | 11.30 | | 10.65 |
| Na2O | 8.04 | 8.53 | 8.60 | 8.27 | | 8.91 | | 9.01 | | 8.84 | | 8.86 | | 8.49 | | 9.01 |
| K2O | 0.09 | 0.01 | 0.01 | 0.01 | | 0.01 | | 0.01 | | 0.01 | | 0.02 | | 0.01 | | 0.01 |
| **Total** | 98.99 | 99.51 | 100.85 | 101.43 | | 101.11 | | 100.87 | | 101.65 | | 100.87 | | 101.64 | | 100.89 |
| **Cations (based on 6 oxygens)** | | | | | | |  | |  | |  | |  | |  | |
| Si | 2.005 | 1.998 | 2.006 | 2.009 | | 2.017 | | 2.011 | | 2.013 | | 2.015 | | 2.011 | | 2.008 |
| Ti | 0.00 | 0.007 | 0.002 | 0.006 | | 0.002 | | 0.004 | | 0.00 | | 0.02 | | 0.001 | | 0.00 |
| Cr | 0.004 | 0.003 | 0.00 | 0.003 | | 0.00 | | 0.00 | | 0.00 | | 0.00 | | 0.007 | | 0.003 |
| Al | 0.376 | 0.405 | 0.397 | 0.363 | | 0.408 | | 0.413 | | 0.416 | | 0.404 | | 0.383 | | 0.431 |
| Fe3+ | 0.202 | 0.189 | 0.206 | 0.203 | | 0.210 | | 0.213 | | 0.200 | | 0.215 | | 0.202 | | 0.198 |
| Fe2+ | 0.050 | 0.040 | 0.060 | 0.039 | | 0.008 | | 0.036 | | 0.062 | | 0.033 | | 0.058 | | 0.041 |
| Mn | 0.008 | 0.00 | 0.002 | 0.005 | | 0.005 | | 0.009 | | 0.00 | | 0.00 | | 0.00 | | 0.00 |
| Mg | 0.417 | 0.406 | 0.395 | 0.411 | | 0.378 | | 0.368 | | 0.370 | | 0.383 | | 0.397 | | 0.366 |
| Ni | 0.00 | 0.00 | 0.00 | 0.00 | | 0.00 | | 0.00 | | 0.00 | | 0.00 | | 0.00 | | 0.00 |
| Ca | 0.453 | 0.439 | 0.423 | 0.474 | | 0.436 | | 0.408 | | 0.408 | | 0.416 | | 0.437 | | 0.412 |
| Na | 0.578 | 0.607 | 0.606 | 0.580 | | 0.623 | | 0.634 | | 0.616 | | 0.622 | | 0.594 | | 0.631 |
| K | 0.004 | 0.001 | 0.001 | 0.001 | | 0.001 | | 0.001 | | 0.001 | | 0.001 | | 0.001 | | 0.001 |
| **End-members** | | | | |  | |  | |  | |  | |  | |  | |
| Diopside | 0.398 | 0.398 | 0.365 | 0.428 | | 0.422 | | 0.363 | | 0.350 | | 0.383 | | 0.381 | | 0.370 |
| Wollastonite | 0.226 | 0.219 | 0.211 | 0.237 | | 0.218 | | 0.204 | | 0.204 | | 0.208 | | 0.218 | | 0.206 |
| Enstatite | 0.208 | 0.203 | 0.197 | 0.205 | | 0.189 | | 0.184 | | 0.185 | | 0.192 | | 0.198 | | 0.183 |
| Ferrosilite | 0.025 | 0.020 | 0.030 | 0.019 | | 0.004 | | 0.018 | | 0.031 | | 0.017 | | 0.029 | | 0.021 |
| Pyroxmangite | 0.004 | 0.00 | 0.001 | 0.002 | | 0.003 | | 0.005 | | 0.00 | | 0.00 | | 0.00 | | 0.00 |
| CaAl2SiO6 | 0.00 | 0.00 | 0.00 | 0.00 | | 0.00 | | 0.00 | | 0.00 | | 0.00 | | 0.00 | | 0.00 |
| CaFe2SiO6 | 0.00 | 0.00 | 0.00 | 0.00 | | 0.00 | | 0.00 | | 0.00 | | 0.00 | | 0.00 | | 0.00 |
| CaCr2SiO6 | 0.00 | 0.00 | 0.00 | 0.00 | | 0.00 | | 0.00 | | 0.00 | | 0.00 | | 0.00 | | 0.00 |
| Aegirine | 0.202 | 0.189 | 0.206 | 0.203 | | 0.210 | | 0.213 | | 0.200 | | 0.215 | | 0.202 | | 0.198 |
| Jadeite | 0.376 | 0.403 | 0.397 | 0.363 | | 0.408 | | 0.413 | | 0.416 | | 0.404 | | 0.383 | | 0.431 |
| CaTiAl2O6 | 0.00 | 0.001 | 0.00 | 0.00 | | 0.00 | | 0.00 | | 0.00 | | 0.00 | | 0.00 | | 0.00 |

**Table S9**

Sample (thin section): **PIEM89**

| **Clinopyroxenes** | | | | | | |  | |  | |  | |  | |  | |
| --- | --- | --- | --- | --- | --- | --- | --- | --- | --- | --- | --- | --- | --- | --- | --- | --- |
| **Oxides (wt %)** | **1** | **2** | **3** | **4** | | **5** | | **6** | | **7** | | **8** | | **9** | | **10** |
| SiO2 | 55.86 | 55.10 | 55.68 | 55.47 | | 54.71 | | 55.19 | | 54.81 | | 54.10 | | 55.69 | | 55.80 |
| TiO2 | 0.01 | 0.10 | 0.01 | 0.06 | | 0.01 | | 0.06 | | 0.01 | | 0.01 | | 0.08 | | 0.01 |
| Cr2O3 | 0.01 | 0.10 | 0.09 | 0.01 | | 0.04 | | 0.09 | | 0.10 | | 0.01 | | 0.04 | | 0.04 |
| Al2O3 | 6.82 | 6.51 | 6.96 | 5.93 | | 6.57 | | 8.79 | | 7.03 | | 4.46 | | 8.80 | | 8.25 |
| Fe2O3 | 5.14 | 5.54 | 6.60 | 4.64 | | 5.84 | | 5.49 | | 5.64 | | 4.60 | | 4.87 | | 6.44 |
| FeO | 2.58 | 1.89 | 1.74 | 3.62 | | 2.79 | | 2.81 | | 2.84 | | 4.69 | | 3.18 | | 1.07 |
| MnO | 0.28 | 0.21 | 0.03 | 0.06 | | 0.09 | | 0.05 | | 0.21 | | 0.43 | | 0.17 | | 0.02 |
| MgO | 9.26 | 9.74 | 9.05 | 9.72 | | 9.70 | | 8.19 | | 9.03 | | 10.14 | | 8.18 | | 8.47 |
| NiO | 0.00 | 0.00 | 0.00 | 0.00 | | 0.00 | | 0.00 | | 0.00 | | 0.00 | | 0.00 | | 0.00 |
| CaO | 15.64 | 15.56 | 14.62 | 16.37 | | 15.53 | | 13.05 | | 14.39 | | 17.88 | | 13.19 | | 13.73 |
| Na2O | 6.14 | 6.22 | 6.83 | 5.45 | | 6.03 | | 7.40 | | 6.46 | | 4.45 | | 7.31 | | 7.53 |
| K2O | 0.02 | 0.01 | 0.01 | 0.01 | | 0.01 | | 0.01 | | 0.08 | | 0.01 | | 0.01 | | 0.01 |
| **Total** | 101.77 | 100.99 | 101.62 | 101.34 | | 101.31 | | 101.13 | | 100.61 | | 100.78 | | 101.52 | | 101.36 |
| **Cations (based on 6 oxygens)** | | | | | | |  | |  | |  | |  | |  | |
| Si | 2.012 | 2.002 | 2.012 | 2.012 | | 1.991 | | 1.995 | | 2.003 | | 1.998 | | 2.001 | | 2.009 |
| Ti | 0.00 | 0.003 | 0.00 | 0.002 | | 0.00 | | 0.002 | | 0.00 | | 0.00 | | 0.002 | | 0.00 |
| Cr | 0.00 | 0.003 | 0.003 | 0.00 | | 0.001 | | 0.003 | | 0.003 | | 0.00 | | 0.001 | | 0.001 |
| Al | 0.290 | 0.279 | 0.297 | 0.254 | | 0.282 | | 0.374 | | 0.303 | | 0.194 | | 0.373 | | 0.350 |
| Fe3+ | 0.139 | 0.152 | 0.180 | 0.127 | | 0.160 | | 0.149 | | 0.155 | | 0.128 | | 0.132 | | 0.174 |
| Fe2+ | 0.078 | 0.058 | 0.053 | 0.110 | | 0.085 | | 0.085 | | 0.087 | | 0.145 | | 0.096 | | 0.032 |
| Mn | 0.009 | 0.007 | 0.001 | 0.002 | | 0.003 | | 0.002 | | 0.007 | | 0.014 | | 0.005 | | 0.001 |
| Mg | 0.497 | 0.528 | 0.488 | 0.526 | | 0.526 | | 0.441 | | 0.492 | | 0.558 | | 0.438 | | 0.455 |
| Ni | 0.00 | 0.00 | 0.00 | 0.00 | | 0.00 | | 0.00 | | 0.00 | | 0.00 | | 0.00 | | 0.00 |
| Ca | 0.604 | 0.606 | 0.566 | 0.636 | | 0.606 | | 0.505 | | 0.564 | | 0.708 | | 0.508 | | 0.530 |
| Na | 0.429 | 0.438 | 0.479 | 0.383 | | 0.426 | | 0.519 | | 0.458 | | 0.319 | | 0.509 | | 0.526 |
| K | 0.001 | 0.001 | 0.001 | 0.001 | | 0.001 | | 0.001 | | 0.004 | | 0.001 | | 0.001 | | 0.001 |
| **End-members** | | | | |  | |  | |  | |  | |  | |  | |
| Diopside | 0.514 | 0.540 | 0.510 | 0.525 | | 0.512 | | 0.420 | | 0.474 | | 0.550 | | 0.413 | | 0.494 |
| Wollastonite | 0.302 | 0.303 | 0.283 | 0.318 | | 0.299 | | 0.251 | | 0.282 | | 0.353 | | 0.254 | | 0.265 |
| Enstatite | 0.249 | 0.264 | 0.244 | 0.263 | | 0.263 | | 0.221 | | 0.246 | | 0.279 | | 0.219 | | 0.227 |
| Ferrosilite | 0.039 | 0.029 | 0.026 | 0.055 | | 0.042 | | 0.042 | | 0.043 | | 0.072 | | 0.048 | | 0.016 |
| Pyroxmangite | 0.004 | 0.003 | 0.00 | 0.001 | | 0.001 | | 0.001 | | 0.003 | | 0.007 | | 0.003 | | 0.00 |
| CaAl2SiO6 | 0.00 | 0.00 | 0.00 | 0.00 | | 0.007 | | 0.00 | | 0.00 | | 0.001 | | 0.00 | | 0.00 |
| CaFe2SiO6 | 0.00 | 0.00 | 0.00 | 0.00 | | 0.00 | | 0.00 | | 0.00 | | 0.00 | | 0.00 | | 0.00 |
| CaCr2SiO6 | 0.00 | 0.00 | 0.00 | 0.00 | | 0.001 | | 0.002 | | 0.00 | | 0.00 | | 0.00 | | 0.00 |
| Aegirine | 0.139 | 0.152 | 0.179 | 0.127 | | 0.160 | | 0.149 | | 0.155 | | 0.128 | | 0.132 | | 0.174 |
| Jadeite | 0.289 | 0.279 | 0.296 | 0.254 | | 0.266 | | 0.369 | | 0.303 | | 0.191 | | 0.373 | | 0.350 |
| CaTiAl2O6 | 0.00 | 0.00 | 0.00 | 0.00 | | 0.00 | | 0.002 | | 0.00 | | 0.00 | | 0.00 | | 0.00 |

**Table S10**

**Na-PYROXENE + GARNET ROCKS**

**Eclogite**

Sample (thin section): **PIEM76**

| **Clinopyroxenes** | | | | | | |  | |  | |  | |  | |  | |
| --- | --- | --- | --- | --- | --- | --- | --- | --- | --- | --- | --- | --- | --- | --- | --- | --- |
| **Oxides (wt %)** | **1** | **2** | **3** | **4** | | **5** | | **6** | | **7** | | **8** | | **9** | | **10** |
| SiO2 | 54.12 | 54.82 | 54.87 | 54.64 | | 54.53 | | 53.84 | | 54.38 | | 55.01 | | 53.99 | | 54.35 |
| TiO2 | 0.12 | 0.08 | 0.01 | 0.18 | | 0.03 | | 0.26 | | 0.28 | | 0.03 | | 0.27 | | 0.01 |
| Cr2O3 | 0.01 | 0.08 | 0.01 | 0.01 | | 0.17 | | 0.22 | | 0.20 | | 0.24 | | 0.01 | | 0.17 |
| Al2O3 | 7.34 | 9.53 | 9.22 | 8.88 | | 9.15 | | 7.71 | | 8.59 | | 9.38 | | 8.01 | | 7.94 |
| Fe2O3 | 5.47 | 6.05 | 5.62 | 5.13 | | 5.54 | | 5.22 | | 4.17 | | 5.46 | | 4.73 | | 4.88 |
| FeO | 5.21 | 4.00 | 4.10 | 5.11 | | 4.79 | | 5.22 | | 5.89 | | 4.50 | | 5.27 | | 5.93 |
| MnO | 0.07 | 0.02 | 0.08 | 0.13 | | 0.14 | | 0.26 | | 0.24 | | 0.01 | | 0.34 | | 0.11 |
| MgO | 7.30 | 5.87 | 6.42 | 6.61 | | 6.18 | | 7.05 | | 6.79 | | 6.10 | | 6.61 | | 6.85 |
| NiO | 0.00 | 0.00 | 0.00 | 0.00 | | 0.00 | | 0.00 | | 0.00 | | 0.00 | | 0.00 | | 0.00 |
| CaO | 14.22 | 11.84 | 12.51 | 12.54 | | 12.34 | | 13.69 | | 12.80 | | 12.05 | | 12.86 | | 13.52 |
| Na2O | 6.63 | 8.23 | 7.79 | 7.48 | | 7.75 | | 6.76 | | 6.98 | | 7.93 | | 6.91 | | 6.79 |
| K2O | 0.01 | 0.01 | 0.01 | 0.01 | | 0.01 | | 0.01 | | 0.05 | | 0.02 | | 0.01 | | 0.01 |
| **Total** | 100.50 | 100.54 | 100.63 | 100.72 | | 100.64 | | 100.23 | | 100.38 | | 100.74 | | 99.00 | | 100.56 |
| **Cations (based on 6 oxygens)** | | | | | | |  | |  | |  | |  | |  | |
| Si | 1.998 | 2.005 | 2.004 | 1.998 | | 1.998 | | 1.992 | | 1.996 | | 2.006 | | 2.010 | | 2.001 |
| Ti | 0.003 | 0.002 | 0.00 | 0.005 | | 0.001 | | 0.007 | | 0.008 | | 0.001 | | 0.008 | | 0.00 |
| Cr | 0.00 | 0.002 | 0.00 | 0.00 | | 0.005 | | 0.006 | | 0.006 | | 0.007 | | 0.00 | | 0.005 |
| Al | 0.319 | 0.411 | 0.397 | 0.383 | | 0.395 | | 0.336 | | 0.372 | | 0.403 | | 0.352 | | 0.345 |
| Fe3+ | 0.152 | 0.167 | 0.154 | 0.141 | | 0.153 | | 0.145 | | 0.115 | | 0.150 | | 0.132 | | 0.135 |
| Fe2+ | 0.161 | 0.123 | 0.125 | 0.156 | | 0.147 | | 0.161 | | 0.181 | | 0.137 | | 0.164 | | 0.183 |
| Mn | 0.002 | 0.001 | 0.003 | 0.004 | | 0.004 | | 0.008 | | 0.008 | | 0.00 | | 0.011 | | 0.003 |
| Mg | 0.402 | 0.320 | 0.349 | 0.360 | | 0.338 | | 0.389 | | 0.371 | | 0.332 | | 0.367 | | 0.376 |
| Ni | 0.00 | 0.00 | 0.00 | 0.00 | | 0.00 | | 0.00 | | 0.00 | | 0.00 | | 0.00 | | 0.00 |
| Ca | 0.563 | 0.464 | 0.489 | 0.491 | | 0.485 | | 0.543 | | 0.503 | | 0.471 | | 0.513 | | 0.533 |
| Na | 0.475 | 0.584 | 0.552 | 0.530 | | 0.551 | | 0.485 | | 0.497 | | 0.561 | | 0.499 | | 0.485 |
| K | 0.001 | 0.001 | 0.001 | 0.001 | | 0.001 | | 0.001 | | 0.002 | | 0.001 | | 0.001 | | 0.001 |
| **End-members** | | | | |  | |  | |  | |  | |  | |  | |
| Diopside | 0.400 | 0.335 | 0.359 | 0.339 | | 0.334 | | 0.375 | | 0.332 | | 0.333 | | 0.347 | | 0.357 |
| Wollastonite | 0.281 | 0.232 | 0.245 | 0.245 | | 0.242 | | 0.269 | | 0.250 | | 0.235 | | 0.257 | | 0.267 |
| Enstatite | 0.201 | 0.160 | 0.175 | 0.180 | | 0.169 | | 0.194 | | 0.186 | | 0.166 | | 0.183 | | 0.188 |
| Ferrosilite | 0.080 | 0.061 | 0.063 | 0.078 | | 0.073 | | 0.081 | | 0.090 | | 0.069 | | 0.082 | | 0.091 |
| Pyroxmangite | 0.001 | 0.00 | 0.001 | 0.002 | | 0.002 | | 0.004 | | 0.004 | | 0.00 | | 0.005 | | 0.002 |
| CaAl2SiO6 | 0.00 | 0.00 | 0.00 | 0.00 | | 0.00 | | 0.00 | | 0.00 | | 0.00 | | 0.00 | | 0.00 |
| CaFe2SiO6 | 0.00 | 0.00 | 0.00 | 0.00 | | 0.00 | | 0.00 | | 0.00 | | 0.00 | | 0.00 | | 0.00 |
| CaCr2SiO6 | 0.00 | 0.00 | 0.00 | 0.00 | | 0.00 | | 0.00 | | 0.00 | | 0.00 | | 0.00 | | 0.00 |
| Aegirine | 0.152 | 0.167 | 0.154 | 0.141 | | 0.153 | | 0.145 | | 0.115 | | 0.150 | | 0.132 | | 0.135 |
| Jadeite | 0.318 | 0.411 | 0.397 | 0.381 | | 0.393 | | 0.328 | | 0.367 | | 0.403 | | 0.352 | | 0.345 |
| CaTiAl2O6 | 0.001 | 0.00 | 0.00 | 0.001 | | 0.001 | | 0.004 | | 0.002 | | 0.00 | | 0.00 | | 0.00 |

**Table S11**

| **Garnets** | | | | | | |
| --- | --- | --- | --- | --- | --- | --- |
| **Oxides (wt %)** | **1** | **2** | **3** | **4** | | **5** |
| SiO2 | 37.71 | 37.29 | 37.17 | 37.45 | | 37.49 |
| Al2O3 | 20.50 | 20.59 | 20.46 | 20.45 | | 20.26 |
| Fe2O3 | 0.00 | 0.00 | 0.00 | 0.00 | | 0.00 |
| FeO | 36.17 | 36.40 | 29.47 | 33.88 | | 36.13 |
| MnO | 0.92 | 0.20 | 6.04 | 2.56 | | 0.27 |
| MgO | 1.64 | 1.73 | 1.26 | 1.43 | | 2.03 |
| CaO | 4.78 | 4.57 | 5.61 | 5.47 | | 4.73 |
| Na2O | 0.22 | 0.15 | 0.21 | 0.07 | | 0.10 |
| K2O | 0.01 | 0.01 | 0.01 | 0.01 | | 0.01 |
| **Total** | 101.95 | 100.94 | 100.23 | 101.32 | | 101.02 |
| **Cations (based on 12 oxygens)** | | | | | | |
| Si | 3.01 | 3.00 | 3.01 | 3.01 | | 3.01 |
| Al | 1.93 | 1.95 | 1.95 | 1.93 | | 1.92 |
| Fe3+ | 0.00 | 0.00 | 0.00 | 0.00 | | 0.00 |
| Fe2+ | 2.42 | 2.45 | 2.00 | 2.27 | | 2.43 |
| Mn | 0.06 | 0.01 | 0.41 | 0.17 | | 0.02 |
| Mg | 0.20 | 0.21 | 0.15 | 0.17 | | 0.24 |
| Ca | 0.41 | 0.39 | 0.49 | 0.47 | | 0.41 |
| **X** | 3.01 | 3,00 | 3.01 | 3.01 | | 3.01 |
| **Y** | 1.93 | 1.95 | 1.95 | 1.93 | | 1.92 |
| **Z** | 3.08 | 3,07 | 3.05 | 0.47 | | 3.10 |
| **Total** | 8.02 | 8.02 | 8.01 | 8.03 | | 8.03 |
| **End-members** | | | | |  | |
| Grossular | 0.014 | 0.034 | 0.071 | 0.038 | | 0.033 |
| Almandine | 0.765 | 0.784 | 0.632 | 0.712 | | 0.768 |
| Pyrope | 0.069 | 0.072 | 0.053 | 0.059 | | 0.084 |
| Spessartine | 0.022 | 0.005 | 0.145 | 0.060 | | 0.006 |
| Andradite | 0.129 | 0.096 | 0.097 | 0.117 | | 0.106 |
| Uvarovite | 0.00 | 0.00 | 0.00 | 0.00 | | 0.00 |
| Ti-Al Garnet | 0.00 | 0.00 | 0.00 | 0.00 | | 0.00 |
| Na-Ti Garnet | 0.001 | 0.009 | 0.002 | 0.012 | | 0.003 |

**Table S12**

Sample (thin section): **PIEM77**

| **Clinopyroxenes** | | | | | | |  | |  | |  | |  | |  | |
| --- | --- | --- | --- | --- | --- | --- | --- | --- | --- | --- | --- | --- | --- | --- | --- | --- |
| **Oxides (wt %)** | **1** | **2** | **3** | **4** | | **5** | | **6** | | **7** | | **8** | | **9** | | **10** |
| SiO2 | 55.17 | 55.69 | 55.11 | 55.28 | | 55.89 | | 55.51 | | 56.01 | | 55.94 | | 55.75 | | 55.17 |
| TiO2 | 0.01 | 0.46 | 0.01 | 0.11 | | 0.46 | | 0.15 | | 0.10 | | 0.03 | | 0.01 | | 0.01 |
| Cr2O3 | 0.01 | 0.01 | 0.01 | 0.01 | | 0.01 | | 0.08 | | 0.06 | | 0.01 | | 0.07 | | 0.01 |
| Al2O3 | 8.49 | 10.83 | 9.78 | 10.03 | | 10.96 | | 10.08 | | 10.52 | | 10.82 | | 9.59 | | 8.49 |
| Fe2O3 | 3.75 | 5.07 | 5.40 | 4.57 | | 5.26 | | 2.84 | | 3.70 | | 5.71 | | 3.71 | | 3.75 |
| FeO | 1.72 | 1.89 | 1.12 | 2.03 | | 1.91 | | 1.91 | | 1.93 | | 0.00 | | 1.08 | | 1.72 |
| MnO | 0.01 | 0.26 | 0.08 | 0.18 | | 0.26 | | 0.06 | | 0.01 | | 0.03 | | 0.18 | | 0.01 |
| MgO | 9.77 | 7.32 | 7.95 | 7.88 | | 7.13 | | 8.56 | | 8.00 | | 7.89 | | 9.01 | | 9.77 |
| NiO | 0.00 | 0.00 | 0.00 | 0.00 | | 0.00 | | 0.00 | | 0.00 | | 0.00 | | 0.00 | | 0.00 |
| CaO | 15.12 | 10.09 | 12.99 | 12.72 | | 10.09 | | 13.49 | | 12.68 | | 11.77 | | 14.25 | | 15.12 |
| Na2O | 6.28 | 9.03 | 7.78 | 7.68 | | 9.01 | | 7.17 | | 7.82 | | 8.76 | | 7.06 | | 6.28 |
| K2O | 0.01 | 0.01 | 0.08 | 0.03 | | 0.01 | | 0.01 | | 0.01 | | 0.01 | | 0.01 | | 0.01 |
| **Total** | 100.35 | 100.69 | 100.31 | 100.52 | | 100.99 | | 99.86 | | 100.84 | | 100.97 | | 100.71 | | 100.35 |
| **Cations (based on 6 oxygens)** | | | | | | |  | |  | |  | |  | |  | |
| Si | 1.988 | 1.998 | 1.992 | 1.991 | | 1.998 | | 1.993 | | 1.996 | | 1.995 | | 1.992 | | 1.988 |
| Ti | 0.00 | 0.012 | 0.00 | 0.003 | | 0.012 | | 0.004 | | 0.003 | | 0.001 | | 0.00 | | 0.00 |
| Cr | 0.00 | 0.00 | 0.00 | 0.00 | | 0.00 | | 0.002 | | 0.002 | | 0.00 | | 0.002 | | 0.00 |
| Al | 0.361 | 0.455 | 0.417 | 0.426 | | 0.462 | | 0.427 | | 0.442 | | 0.455 | | 0.404 | | 0.361 |
| Fe3+ | 0.102 | 0.147 | 0.147 | 0.124 | | 0.142 | | 0.077 | | 0.099 | | 0.153 | | 0.100 | | 0.102 |
| Fe2+ | 0.052 | 0.060 | 0.034 | 0.061 | | 0.057 | | 0.057 | | 0.057 | | 0.00 | | 0.032 | | 0.052 |
| Mn | 0.00 | 0.008 | 0.002 | 0.006 | | 0.008 | | 0.002 | | 0.00 | | 0.001 | | 0.005 | | 0.00 |
| Mg | 0.525 | 0.380 | 0.428 | 0.423 | | 0.380 | | 0.458 | | 0.425 | | 0.419 | | 0.480 | | 0.525 |
| Ni | 0.00 | 0.00 | 0.00 | 0.00 | | 0.00 | | 0.00 | | 0.00 | | 0.00 | | 0.00 | | 0.00 |
| Ca | 0.584 | 0.392 | 0.503 | 0.491 | | 0.387 | | 0.519 | | 0.484 | | 0.450 | | 0.546 | | 0.584 |
| Na | 0.439 | 0.614 | 0.545 | 0.536 | | 0.625 | | 0.499 | | 0.540 | | 0.606 | | 0.489 | | 0.439 |
| K | 0.001 | 0.001 | 0.004 | 0.001 | | 0.001 | | 0.001 | | 0.001 | | 0.001 | | 0.001 | | 0.001 |
| **End-members** | | | | |  | |  | |  | |  | |  | |  | |
| Diopside | 0.520 | 0.359 | 0.457 | 0.419 | | 0.329 | | 0.456 | | 0.425 | | 0.448 | | 0.498 | | 0.520 |
| Wollastonite | 0.286 | 0.198 | 0.248 | 0.242 | | 0.193 | | 0.258 | | 0.241 | | 0.224 | | 0.269 | | 0.286 |
| Enstatite | 0.262 | 0.192 | 0.214 | 0.212 | | 0.190 | | 0.229 | | 0.212 | | 0.210 | | 0.240 | | 0.262 |
| Ferrosilite | 0.026 | 0.028 | 0.017 | 0.031 | | 0.028 | | 0.029 | | 0.029 | | 0.00 | | 0.016 | | 0.026 |
| Pyroxmangite | 0.00 | 0.003 | 0.001 | 0.003 | | 0.004 | | 0.001 | | 0.00 | | 0.00 | | 0.003 | | 0.00 |
| CaAl2SiO6 | 0.011 | 0.00 | 0.007 | 0.003 | | 0.00 | | 0.00 | | 0.00 | | 0.00 | | 0.006 | | 0.011 |
| CaFe2SiO6 | 0.00 | 0.00 | 0.00 | 0.00 | | 0.00 | | 0.00 | | 0.00 | | 0.00 | | 0.00 | | 0.00 |
| CaCr2SiO6 | 0.00 | 0.00 | 0.00 | 0.00 | | 0.00 | | 0.00 | | 0.00 | | 0.00 | | 0.002 | | 0.00 |
| Aegirine | 0.102 | 0.142 | 0.147 | 0.124 | | 0.142 | | 0.077 | | 0.099 | | 0.153 | | 0.100 | | 0.102 |
| Jadeite | 0.337 | 0.456 | 0.402 | 0.414 | | 0.460 | | 0.419 | | 0.438 | | 0.450 | | 0.390 | | 0.337 |
| CaTiAl2O6 | 0.00 | 0.001 | 0.00 | 0.003 | | 0.001 | | 0.004 | | 0.002 | | 0.001 | | 0.00 | | 0.00 |

**Table S13**

| **Garnets** | | | | | | |
| --- | --- | --- | --- | --- | --- | --- |
| **Oxides (wt %)** | **1** | **2** | **3** | **4** | | **5** |
| SiO2 | 38.48 | 38.18 | 37.98 | 38.57 | | 37.97 |
| Al2O3 | 21.32 | 21.14 | 21.32 | 21.54 | | 20.83 |
| Fe2O3 | 0.00 | 0.00 | 0.00 | 0.00 | | 0.00 |
| FeO | 25.28 | 27.03 | 28.67 | 26.18 | | 28.18 |
| MnO | 0.82 | 1.79 | 1.06 | 1.09 | | 0.70 |
| MgO | 5.69 | 3.51 | 3.91 | 4.28 | | 2.71 |
| CaO | 8.44 | 8.95 | 7.17 | 9.28 | | 10.10 |
| Na2O | 0.17 | 0.02 | 0.20 | 0.20 | | 0.10 |
| K2O | 0.01 | 0.06 | 0.02 | 0.01 | | 0.01 |
| **Total** | 100.21 | 100.68 | 100.33 | 101.15 | | 100.60 |
| **Cations (based on 12 oxygens)** | | | | | | |
| Si | 3.00 | 3.00 | 3.00 | 3.00 | | 3.00 |
| Al | 1.96 | 1.96 | 1.98 | 1.97 | | 1.94 |
| Fe3+ | 0.00 | 0.00 | 0.00 | 0.00 | | 0.00 |
| Fe2+ | 1.65 | 1.78 | 1.89 | 1.70 | | 1.86 |
| Mn | 0.05 | 0.12 | 0.07 | 0.07 | | 0.05 |
| Mg | 0.66 | 0.41 | 0.46 | 0.50 | | 0.32 |
| Ca | 0.70 | 0.75 | 0.61 | 0.77 | | 0.86 |
| **X** | 3.00 | 3.00 | 3.00 | 3.00 | | 3.00 |
| **Y** | 1.96 | 1.96 | 1.98 | 1.97 | | 1.94 |
| **Z** | 3.07 | 3.06 | 3.03 | 3.04 | | 3.08 |
| **Total** | 8.03 | 8.02 | 8.01 | 8.01 | | 8.02 |
| **End-members** | | | | |  | |
| Grossular | 0.139 | 0.169 | 0.131 | 0.154 | | 0.179 |
| Almandine | 0.508 | 0.555 | 0.605 | 0.526 | | 0.574 |
| Pyrope | 0.228 | 0.142 | 0.160 | 0.173 | | 0.111 |
| Spessartine | 0.019 | 0.041 | 0.025 | 0.025 | | 0.016 |
| Andradite | 0.092 | 0.087 | 0.079 | 0.104 | | 0.111 |
| Uvarovite | 0.008 | 0.001 | 0.00 | 0.00 | | 0.004 |
| Ti-Al Garnet | 0.00 | 0.00 | 0.00 | 0.00 | | 0.00 |
| Na-Ti Garnet | 0.006 | 0.004 | 0.001 | 0.017 | | 0.006 |

**Table S14**

Sample (thin section): **PIEM80**

| **Clinopyroxenes** | | | | | | |  | |  | |  | |  | |  | |
| --- | --- | --- | --- | --- | --- | --- | --- | --- | --- | --- | --- | --- | --- | --- | --- | --- |
| **Oxides (wt %)** | **1** | **2** | **3** | **4** | | **5** | | **6** | | **7** | | **8** | | **9** | | **10** |
| SiO2 | 55.88 | 55.28 | 56.52 | 56.14 | | 56.66 | | 58.15 | | 55.71 | | 55.62 | | 56.37 | | 55.48 |
| TiO2 | 0.44 | 0.22 | 0.09 | 0.05 | | 0.04 | | 0.04 | | 0.20 | | 0.01 | | 0.06 | | 0.16 |
| Cr2O3 | 0.01 | 0.09 | 0.02 | 0.01 | | 0.01 | | 0.01 | | 0.01 | | 0.01 | | 0.01 | | 0.01 |
| Al2O3 | 14.40 | 13.94 | 16.77 | 14.14 | | 17.86 | | 23.87 | | 12.70 | | 13.24 | | 14.48 | | 12.60 |
| Fe2O3 | 5.34 | 6.89 | 5.69 | 6.26 | | 6.78 | | 1.86 | | 5.14 | | 7.73 | | 6.99 | | 5.86 |
| FeO | 2.22 | 0.64 | 1.37 | 0.97 | | 0.42 | | 0.00 | | 2.61 | | 1.30 | | 0.17 | | 1.68 |
| MnO | 0.11 | 0.11 | 0.14 | 0.01 | | 0.14 | | 0.02 | | 0.08 | | 0.15 | | 0.10 | | 0.04 |
| MgO | 4.42 | 4.61 | 3.00 | 4.26 | | 1.89 | | 0.30 | | 5.19 | | 4.18 | | 3.98 | | 5.01 |
| NiO | 0.00 | 0.00 | 0.00 | 0.00 | | 0.00 | | 0.00 | | 0.00 | | 0.00 | | 0.00 | | 0.00 |
| CaO | 7.02 | 7.53 | 4.68 | 6.87 | | 3.25 | | 0.68 | | 8.71 | | 7.12 | | 6.78 | | 8.22 |
| Na2O | 10.84 | 10.88 | 12.34 | 11.06 | | 13.49 | | 15.30 | | 9.82 | | 11.02 | | 11.56 | | 10.04 |
| K2O | 0.05 | 0.11 | 0.05 | 0.01 | | 0.05 | | 0.02 | | 0.08 | | 0.06 | | 0.01 | | 0.03 |
| **Total** | 100.74 | 100.30 | 100.67 | 99.78 | | 100.59 | | 100.25 | | 100.24 | | 100.43 | | 100.51 | | 99.13 |
| **Cations (based on 6 oxygens)** | | | | | | |  | |  | |  | |  | |  | |
| Si | 1.990 | 1.986 | 1.996 | 2.013 | | 2.000 | | 1.982 | | 2.002 | | 2.007 | | 2.009 | | 2.013 |
| Ti | 0.012 | 0.006 | 0.002 | 0.001 | | 0.001 | | 0.001 | | 0.005 | | 0.00 | | 0.002 | | 0.004 |
| Cr | 0.00 | 0.003 | 0.001 | 0.00 | | 0.00 | | 0.00 | | 0.00 | | 0.00 | | 0.00 | | 0.00 |
| Al | 0.604 | 0.590 | 0.698 | 0.598 | | 0.743 | | 0.959 | | 0.538 | | 0.563 | | 0.608 | | 0.539 |
| Fe3+ | 0.143 | 0.186 | 0.151 | 0.169 | | 0.180 | | 0.048 | | 0.139 | | 0.210 | | 0.188 | | 0.160 |
| Fe2+ | 0.066 | 0.019 | 0.041 | 0.029 | | 0.012 | | 0.00 | | 0.078 | | 0.039 | | 0.005 | | 0.051 |
| Mn | 0.003 | 0.003 | 0.004 | 0.00 | | 0.004 | | 0.001 | | 0.002 | | 0.005 | | 0.003 | | 0.001 |
| Mg | 0.235 | 0.247 | 0.158 | 0.228 | | 0.100 | | 0.015 | | 0.278 | | 0.225 | | 0.211 | | 0.271 |
| Ni | 0.00 | 0.00 | 0.00 | 0.00 | | 0.00 | | 0.00 | | 0.00 | | 0.00 | | 0.00 | | 0.00 |
| Ca | 0.268 | 0.290 | 0.177 | 0.264 | | 0.123 | | 0.025 | | 0.335 | | 0.275 | | 0.259 | | 0.320 |
| Na | 0.748 | 0.758 | 0.845 | 0.769 | | 0.923 | | 1.011 | | 0.684 | | 0.771 | | 0.799 | | 0.706 |
| K | 0.002 | 0.005 | 0.002 | 0.001 | | 0.002 | | 0.001 | | 0.004 | | 0.003 | | 0.001 | | 0.001 |
| **End-members** | | | | |  | |  | |  | |  | |  | |  | |
| Diopside | 0.203 | 0.258 | 0.137 | 0.234 | | 0.105 | | 0.023 | | 0.260 | | 0.230 | | 0.249 | | 0.268 |
| Wollastonite | 0.131 | 0.141 | 0.088 | 0.132 | | 0.061 | | 0.012 | | 0.168 | | 0.138 | | 0.129 | | 0.160 |
| Enstatite | 0.117 | 0.123 | 0.079 | 0.114 | | 0.050 | | 0.008 | | 0.139 | | 0.112 | | 0.106 | | 0.135 |
| Ferrosilite | 0.033 | 0.010 | 0.020 | 0.015 | | 0.006 | | 0.00 | | 0.039 | | 0.020 | | 0.002 | | 0.026 |
| Pyroxmangite | 0.002 | 0.002 | 0.002 | 0.00 | | 0.002 | | 0.00 | | 0.001 | | 0.002 | | 0.002 | | 0.001 |
| CaAl2SiO6 | 0.00 | 0.00 | 0.00 | 0.00 | | 0.00 | | 0.00 | | 0.00 | | 0.00 | | 0.00 | | 0.00 |
| CaFe2SiO6 | 0.00 | 0.00 | 0.00 | 0.00 | | 0.00 | | 0.00 | | 0.00 | | 0.00 | | 0.00 | | 0.00 |
| CaCr2SiO6 | 0.00 | 0.002 | 0.00 | 0.00 | | 0.00 | | 0.00 | | 0.00 | | 0.00 | | 0.00 | | 0.00 |
| Aegirine | 0.143 | 0.186 | 0.151 | 0.169 | | 0.180 | | 0.048 | | 0.139 | | 0.210 | | 0.188 | | 0.160 |
| Jadeite | 0.594 | 0.576 | 0.694 | 0.598 | | 0.743 | | 0.941 | | 0.538 | | 0.563 | | 0.608 | | 0.539 |
| CaTiAl2O6 | 0.005 | 0.006 | 0.002 | 0.00 | | 0.00 | | 0.001 | | 0.00 | | 0.00 | | 0.00 | | 0.00 |

**Table S15**

| **Garnets** | | | | | | |
| --- | --- | --- | --- | --- | --- | --- |
| **Oxides (wt %)** | **1** | **2** | **3** | **4** | | **5** |
| SiO2 | 37.78 | 37.04 | 38.05 | 37.54 | | 37.51 |
| Al2O3 | 20.51 | 20.49 | 20.82 | 20.78 | | 20.68 |
| Fe2O3 | 0.00 | 0.00 | 0.00 | 0.00 | | 0.00 |
| FeO | 31.08 | 31.47 | 30.27 | 32.11 | | 32.13 |
| MnO | 0.41 | 0.80 | 0.58 | 0.33 | | 1.00 |
| MgO | 0.89 | 2.34 | 1.87 | 0.91 | | 0.72 |
| CaO | 10.51 | 6.94 | 9.72 | 9.29 | | 9.02 |
| Na2O | 0.12 | 0.07 | 0.07 | 0.12 | | 0.23 |
| K2O | 0.04 | 0.10 | 0.03 | 0.01 | | 0.01 |
| **Total** | 101.34 | 99.25 | 101.41 | 101.09 | | 101.30 |
| **Cations (based on 12 oxygens)** | | | | | | |
| Si | 3.01 | 3.00 | 3.01 | 3.00 | | 3.00 |
| Al | 1.92 | 1.96 | 1.94 | 1.96 | | 1.95 |
| Fe3+ | 0.00 | 0.00 | 0.00 | 0.00 | | 0.00 |
| Fe2+ | 2.07 | 2.13 | 2.00 | 2.14 | | 2.15 |
| Mn | 0.03 | 0.06 | 0.04 | 0.02 | | 0.07 |
| Mg | 0.11 | 0.28 | 0.22 | 0.11 | | 0.09 |
| Ca | 0.90 | 0.60 | 0.82 | 0.80 | | 0.77 |
| **X** | 3.01 | 3.00 | 3.01 | 3.00 | | 3.00 |
| **Y** | 1.92 | 1.96 | 1.94 | 1.96 | | 1.95 |
| **Z** | 3.10 | 3.07 | 3.08 | 3.07 | | 3.08 |
| **Total** | 8.03 | 8.03 | 8.03 | 8.03 | | 8.03 |
| **End-members** | | | | |  | |
| Grossular | 0.176 | 0.127 | 0.161 | 0.162 | | 0.148 |
| Almandine | 0.637 | 0.678 | 0.620 | 0.675 | | 0.675 |
| Pyrope | 0.037 | 0.097 | 0.077 | 0.038 | | 0.030 |
| Spessartine | 0.010 | 0.019 | 0.014 | 0.008 | | 0.024 |
| Andradite | 0.139 | 0.079 | 0.115 | 0.108 | | 0.115 |
| Uvarovite | 0.00 | 0.00 | 0.004 | 0.002 | | 0.006 |
| Ti-Al Garnet | 0.00 | 0.00 | 0.00 | 0.00 | | 0.00 |
| Na-Ti Garnet | 0.001 | 0.001 | 0.010 | 0.008 | | 0.003 |

**Table S16**

**Garnet-omphacitite**

Sample (thin section): **PIEM75**

| **Clinopyroxenes** | | | | | | |  | |  | |  | |  | |  | |
| --- | --- | --- | --- | --- | --- | --- | --- | --- | --- | --- | --- | --- | --- | --- | --- | --- |
| **Oxides (wt %)** | **1** | **2** | **3** | **4** | | **5** | | **6** | | **7** | | **8** | | **9** | | **10** |
| SiO2 | 55.10 | 55.66 | 55.08 | 56.58 | | 57.17 | | 56.50 | | 54.06 | | 53.07 | | 55.05 | | 55.26 |
| TiO2 | 0.15 | 0.02 | 0.42 | 0.15 | | 0.03 | | 0.01 | | 0.16 | | 0.44 | | 0.01 | | 0.15 |
| Cr2O3 | 0.15 | 0.07 | 0.01 | 0.28 | | 0.12 | | 0.01 | | 0.01 | | 0.12 | | 0.01 | | 0.01 |
| Al2O3 | 12.1 | 11.89 | 10.10 | 11.15 | | 11.60 | | 10.78 | | 6.12 | | 6.36 | | 8.23 | | 10.95 |
| Fe2O3 | 4.19 | 4.41 | 11.54 | 6.63 | | 6.96 | | 6.01 | | 8.40 | | 9.26 | | 7.37 | | 6.61 |
| FeO | 5.28 | 4.89 | 2.86 | 1.37 | | 1.17 | | 1.61 | | 3.68 | | 6.96 | | 1.82 | | 0.94 |
| MnO | 0.11 | 0.24 | 0.22 | 0.01 | | 0.17 | | 0.01 | | 0.22 | | 0.36 | | 0.01 | | 0.06 |
| MgO | 4.34 | 4.74 | 3.39 | 6.70 | | 6.04 | | 7.05 | | 8.40 | | 4.55 | | 7.80 | | 6.61 |
| NiO | 0.00 | 0.00 | 0.00 | 0.00 | | 0.00 | | 0.00 | | 0.00 | | 0.00 | | 0.00 | | 0.00 |
| CaO | 10.29 | 10.97 | 7.01 | 10.10 | | 9.19 | | 10.83 | | 13.90 | | 11.43 | | 12.76 | | 9.92 |
| Na2O | 8.95 | 8.78 | 10.94 | 9.53 | | 9.82 | | 8.89 | | 6.87 | | 7.83 | | 7.87 | | 9.31 |
| K2O | 0.03 | 0.07 | 0.01 | 0.08 | | 0.01 | | 0.01 | | 0.01 | | 0.03 | | 0.01 | | 0.05 |
| **Total** | 100.69 | 101.73 | 101.58 | 102.58 | | 102.29 | | 101.71 | | 101.82 | | 100.41 | | 100.95 | | 99.87 |
| **Cations (based on 6 oxygens)** | | | | | | |  | |  | |  | |  | |  | |
| Si | 1.993 | 1.995 | 2.026 | 2.001 | | 2.020 | | 2.010 | | 1.992 | | 2.016 | | 2.006 | | 2.004 |
| Ti | 0.004 | 0.001 | 0.012 | 0.004 | | 0.001 | | 0.00 | | 0.004 | | 0.013 | | 0.00 | | 0.004 |
| Cr | 0.004 | 0.002 | 0.00 | 0.008 | | 0.003 | | 0.00 | | 0.00 | | 0.004 | | 0.00 | | 0.00 |
| Al | 0.516 | 0.502 | 0.438 | 0.465 | | 0.483 | | 0.452 | | 0.266 | | 0.285 | | 0.353 | | 0.468 |
| Fe3+ | 0.114 | 0.119 | 0.319 | 0.177 | | 0.185 | | 0.161 | | 0.233 | | 0.265 | | 0.202 | | 0.180 |
| Fe2+ | 0.160 | 0.146 | 0.088 | 0.041 | | 0.035 | | 0.048 | | 0.113 | | 0.221 | | 0.056 | | 0.029 |
| Mn | 0.003 | 0.007 | 0.007 | 0.00 | | 0.005 | | 0.00 | | 0.007 | | 0.012 | | 0.00 | | 0.002 |
| Mg | 0.234 | 0.253 | 0.186 | 0.353 | | 0.318 | | 0.374 | | 0.461 | | 0.258 | | 0.424 | | 0.357 |
| Ni | 0.00 | 0.00 | 0.00 | 0.00 | | 0.00 | | 0.00 | | 0.00 | | 0.00 | | 0.00 | | 0.00 |
| Ca | 0.399 | 0.421 | 0.276 | 0.383 | | 0.348 | | 0.413 | | 0.549 | | 0.465 | | 0.498 | | 0.385 |
| Na | 0.628 | 0.610 | 0.780 | 0.653 | | 0.673 | | 0.613 | | 0.491 | | 0.577 | | 0.556 | | 0.655 |
| K | 0.001 | 0.003 | 0.001 | 0.004 | | 0.001 | | 0.001 | | 0.001 | | 0.002 | | 0.001 | | 0.002 |
| **End-members** | | | | |  | |  | |  | |  | |  | |  | |
| Diopside | 0.233 | 0.259 | 0.183 | 0.343 | | 0.309 | | 0.365 | | 0.432 | | 0.244 | | 0.440 | | 0.355 |
| Wollastonite | 0.198 | 0.208 | 0.138 | 0.191 | | 0.174 | | 0.206 | | 0.272 | | 0.233 | | 0.249 | | 0.193 |
| Enstatite | 0.117 | 0.127 | 0.093 | 0.177 | | 0.159 | | 0.187 | | 0.231 | | 0.129 | | 0.212 | | 0.179 |
| Ferrosilite | 0.08 | 0.073 | 0.044 | 0.020 | | 0.017 | | 0.024 | | 0.057 | | 0.111 | | 0.028 | | 0.014 |
| Pyroxmangite | 0.002 | 0.004 | 0.003 | 0.00 | | 0.003 | | 0.00 | | 0.003 | | 0.006 | | 0.00 | | 0.001 |
| CaAl2SiO6 | 0.00 | 0.002 | 0.00 | 0.00 | | 0.00 | | 0.00 | | 0.00 | | 0.00 | | 0.00 | | 0.00 |
| CaFe2SiO6 | 0.00 | 0.00 | 0.00 | 0.00 | | 0.00 | | 0.00 | | 0.00 | | 0.00 | | 0.00 | | 0.00 |
| CaCr2SiO6 | 0.00 | 0.002 | 0.00 | 0.00 | | 0.00 | | 0.00 | | 0.00 | | 0.00 | | 0.00 | | 0.00 |
| Aegirine | 0.114 | 0.119 | 0.319 | 0.177 | | 0.185 | | 0.161 | | 0.233 | | 0.265 | | 0.202 | | 0.180 |
| Jadeite | 0.509 | 0.494 | 0.438 | 0.465 | | 0.483 | | 0.452 | | 0.258 | | 0.285 | | 0.353 | | 0.468 |
| CaTiAl2O6 | 0.003 | 0.001 | 0.00 | 0.00 | | 0.00 | | 0.00 | | 0.004 | | 0.00 | | 0.00 | | 0.00 |

**Table S17**

| **Garnets** | | | | | | |
| --- | --- | --- | --- | --- | --- | --- |
| **Oxides (wt %)** | **1** | **2** | **3** | **4** | | **5** |
| SiO2 | 37.98 | 37.81 | 37.94 | 35.57 | | 38.07 |
| Al2O3 | 21.05 | 20.84 | 21.23 | 21.34 | | 21.36 |
| Fe2O3 | 0.00 | 0.00 | 0.00 | 0.00 | | 0.00 |
| FeO | 29.04 | 28.21 | 28.18 | 27.96 | | 30.01 |
| MnO | 1.78 | 3.41 | 2.68 | 2.97 | | 1.31 |
| MgO | 3.62 | 2.97 | 3.10 | 2.83 | | 3.72 |
| CaO | 7.08 | 7.43 | 7.42 | 7.29 | | 6.30 |
| Na2O | 0.17 | 0.18 | 0.16 | 0.13 | | 0.18 |
| K2O | 0.02 | 0.01 | 0.01 | 0.01 | | 0.01 |
| **Total** | 100.74 | 100.86 | 100.72 | 100.10 | | 100.96 |
| **Cations (based on 12 oxygens)** | | | | | | |
| Si | 3.00 | 3.00 | 3.00 | 2.99 | | 3.00 |
| Al | 1.96 | 1.95 | 1.98 | 2.00 | | 1.98 |
| Fe3+ | 0.00 | 0.00 | 0.00 | 0.00 | | 0.00 |
| Fe2+ | 1.92 | 1.87 | 1.86 | 1.86 | | 1.98 |
| Mn | 0.12 | 0.23 | 0.18 | 0.20 | | 0.09 |
| Mg | 0.43 | 0.35 | 0.37 | 0.34 | | 0.44 |
| Ca | 0.60 | 0.63 | 0.63 | 0.62 | | 0.53 |
| **X** | 3.00 | 3.00 | 3.00 | 2.99 | | 3.00 |
| **Y** | 1.96 | 1.95 | 1.98 | 2.00 | | 1.98 |
| **Z** | 3.06 | 3.08 | 3.04 | 3.02 | | 3.03 |
| **Total** | 8.02 | 8.03 | 8.02 | 8.01 | | 8.01 |
| **End-members** | | | | |  | |
| Grossular | 0.100 | 0.131 | 0.150 | 0.172 | | 0.107 |
| Almandine | 0.600 | 0.585 | 0.597 | 0.607 | | 0.634 |
| Pyrope | 0.149 | 0.119 | 0.124 | 0.113 | | 0.151 |
| Spessartine | 0.042 | 0.078 | 0.061 | 0.068 | | 0.030 |
| Andradite | 0.103 | 0.072 | 0.055 | 0.031 | | 0.074 |
| Uvarovite | 0.005 | 0.00 | 0.00 | 0.001 | | 0.001 |
| Ti-Al Garnet | 0.00 | 0.00 | 0.00 | 0.00 | | 0.00 |
| Na-Ti Garnet | 0.001 | 0.015 | 0.012 | 0.008 | | 0.004 |

**Table S18**

**META-OPHIOLITES FROM THE MONVISO COMPLEX**

Selected spot chemical analyses of clinopyroxenes and garnets (if present) by EDS.

**Na-PYROXENITE**

**Jadeitite**

Sample (thin section): **OF2788**

| **Clinopyroxenes** | | | | | | |  | |  | |  | |  | |  | |
| --- | --- | --- | --- | --- | --- | --- | --- | --- | --- | --- | --- | --- | --- | --- | --- | --- |
| **Oxides (wt %)** | **1** | **2** | **3** | **4** | | **5** | | **6** | | **7** | | **8** | | **9** | | **10** |
| SiO2 | 59.77 | 60.02 | 56.88 | 58.27 | | 57.03 | | 57.86 | | 57.82 | | 56.09 | | 57.25 | | 56.37 |
| TiO2 | 0.01 | 0.01 | 0.21 | 0.07 | | 0.01 | | 0.23 | | 0.50 | | 0.07 | | 0.19 | | 0.19 |
| Cr2O3 | 0.01 | 0.01 | 0.12 | 0.08 | | 0.06 | | 0.11 | | 0.01 | | 0.00 | | 0.01 | | 0.18 |
| Al2O3 | 23.64 | 24.56 | 12.24 | 15.97 | | 11.42 | | 16.63 | | 15.34 | | 11.10 | | 12.05 | | 10.56 |
| Fe2O3 | 1.26 | 0.46 | 6.84 | 8.43 | | 11.60 | | 7.15 | | 9.66 | | 11.66 | | 9.10 | | 11.84 |
| FeO | 0.00 | 0.19 | 3.48 | 0.97 | | 0.25 | | 1.10 | | 0.49 | | 1.10 | | 0.46 | | 1.39 |
| MnO | 0.11 | 0.01 | 0.01 | 0.13 | | 0.12 | | 0.23 | | 0.14 | | 0.24 | | 0.17 | | 0.07 |
| MgO | 0.92 | 0.37 | 4.50 | 2.17 | | 3.80 | | 2.10 | | 2.11 | | 3.91 | | 4.57 | | 4.07 |
| NiO | 0.00 | 0.00 | 0.00 | 0.00 | | 0.00 | | 0.00 | | 0.00 | | 0.00 | | 0.00 | | 0.00 |
| CaO | 1.67 | 0.61 | 8.10 | 3.68 | | 6.12 | | 3.64 | | 3.29 | | 6.02 | | 6.43 | | 6.14 |
| Na2O | 15.13 | 15.10 | 10.30 | 13.06 | | 11.47 | | 13.10 | | 13.46 | | 11.32 | | 11.00 | | 11.23 |
| K2O | 0.01 | 0.03 | 0.01 | 0.01 | | 0.01 | | 0.01 | | 0.01 | | 0.01 | | 0.01 | | 0.01 |
| **Total** | 102.53 | 101.37 | 102.69 | 102.84 | | 101.89 | | 102.16 | | 102.83 | | 101.52 | | 101.23 | | 102.06 |
| **Cations (based on 6 oxygens)** | | | | | | |  | |  | |  | |  | |  | |
| Si | 1.990 | 2.002 | 2.016 | 2.032 | | 2.052 | | 2.020 | | 2.028 | | 2.039 | | 2.047 | | 2.043 |
| Ti | 0.00 | 0.00 | 0.006 | 0.002 | | 0.00 | | 0.006 | | 0.013 | | 0.002 | | 0.005 | | 0.005 |
| Cr | 0.00 | 0.00 | 0.003 | 0.002 | | 0.002 | | 0.003 | | 0.00 | | 0.00 | | 0.00 | | 0.005 |
| Al | 0.928 | 0.966 | 0.511 | 0.656 | | 0.484 | | 0.684 | | 0.634 | | 0.476 | | 0.508 | | 0.451 |
| Fe3+ | 0.032 | 0.012 | 0.182 | 0.221 | | 0.314 | | 0.188 | | 0.255 | | 0.319 | | 0.245 | | 0.323 |
| Fe2+ | 0.00 | 0.05 | 0.103 | 0.028 | | 0.008 | | 0.032 | | 0.014 | | 0.033 | | 0.014 | | 0.042 |
| Mn | 0.003 | 0.00 | 0.00 | 0.004 | | 0.004 | | 0.007 | | 0.004 | | 0.007 | | 0.005 | | 0.002 |
| Mg | 0.046 | 0.018 | 0.238 | 0.113 | | 0.204 | | 0.109 | | 0.110 | | 0.212 | | 0.244 | | 0.220 |
| Ni | 0.00 | 0.00 | 0.00 | 0.00 | | 0.00 | | 0.00 | | 0.00 | | 0.00 | | 0.00 | | 0.00 |
| Ca | 0.060 | 0.022 | 0.308 | 0.138 | | 0.236 | | 0.136 | | 0.124 | | 0.235 | | 0.246 | | 0.238 |
| Na | 0.977 | 0.977 | 0.708 | 0.883 | | 0.800 | | 0.887 | | 0.916 | | 0.798 | | 0.762 | | 0.789 |
| K | 0.00 | 0.001 | 0.001 | 0.00 | | 0.001 | | 0.00 | | 0.00 | | 0.001 | | 0.001 | | 0.001 |
| **End-members** | | | | |  | |  | |  | |  | |  | |  | |
| Diopside | 0.055 | 0.017 | 0.214 | 0.107 | | 0.224 | | 0.100 | | 0.106 | | 0.197 | | 0.229 | | 0.198 |
| Wollastonite | 0.030 | 0.011 | 0.154 | 0.069 | | 0.118 | | 0.068 | | 0.062 | | 0.117 | | 0.123 | | 0.119 |
| Enstatite | 0.023 | 0.009 | 0.119 | 0.056 | | 0.102 | | 0.055 | | 0.055 | | 0.106 | | 0.122 | | 0.110 |
| Ferrosilite | 0.00 | 0.003 | 0.052 | 0.014 | | 0.004 | | 0.016 | | 0.007 | | 0.017 | | 0.007 | | 0.021 |
| Pyroxmangite | 0.002 | 0.00 | 0.00 | 0.002 | | 0.002 | | 0.003 | | 0.002 | | 0.004 | | 0.003 | | 0.001 |
| CaAl2SiO6 | 0.00 | 0.00 | 0.00 | 0.00 | | 0.00 | | 0.00 | | 0.00 | | 0.00 | | 0.00 | | 0.00 |
| CaFe2SiO6 | 0.00 | 0.00 | 0.00 | 0.00 | | 0.00 | | 0.00 | | 0.00 | | 0.00 | | 0.00 | | 0.00 |
| CaCr2SiO6 | 0.00 | 0.00 | 0.00 | 0.00 | | 0.00 | | 0.00 | | 0.00 | | 0.00 | | 0.00 | | 0.00 |
| Aegirine | 0.031 | 0.012 | 0.182 | 0.221 | | 0.314 | | 0.188 | | 0.255 | | 0.319 | | 0.245 | | 0.323 |
| Jadeite | 0.917 | 0.966 | 0.511 | 0.656 | | 0.484 | | 0.684 | | 0.634 | | 0.476 | | 0.508 | | 0.451 |
| CaTiAl2O6 | 0.00 | 0.00 | 0.00 | 0.00 | | 0.00 | | 0.00 | | 0.00 | | 0.00 | | 0.00 | | 0.00 |

**Table S19**

**Na-PYROXENE + GARNET ROCKS**

**Eclogite**

Sample (thin section): **OF2780**

| **Clinopyroxenes** | | | | | | |  | |  | |  | |  | |  | |
| --- | --- | --- | --- | --- | --- | --- | --- | --- | --- | --- | --- | --- | --- | --- | --- | --- |
| **Oxides (wt %)** | **1** | **2** | **3** | **4** | | **5** | | **6** | | **7** | | **8** | | **9** | | **10** |
| SiO2 | 54.65 | 54.79 | 56.05 | 55.62 | | 57.09 | | 56.18 | | 56.35 | | 56.18 | | 55.71 | | 57.09 |
| TiO2 | 0.47 | 0.35 | 0.08 | 0.16 | | 0.05 | | 0.18 | | 0.23 | | 0.01 | | 0.27 | | 0.05 |
| Cr2O3 | 0.08 | 0.13 | 0.11 | 0.04 | | 0.01 | | 0.22 | | 0.01 | | 0.16 | | 0.17 | | 0.01 |
| Al2O3 | 7.20 | 7.50 | 10.21 | 7.87 | | 11.05 | | 10.06 | | 10.14 | | 8.65 | | 9.37 | | 11.05 |
| Fe2O3 | 13.46 | 13.91 | 6.17 | 8.54 | | 7.57 | | 7.08 | | 6.58 | | 9.42 | | 6.84 | | 7.57 |
| FeO | 3.66 | 3.55 | 1.96 | 3.89 | | 0.54 | | 2.00 | | 1.34 | | 2.47 | | 2.11 | | 0.54 |
| MnO | 0.36 | 0.24 | 0.01 | 0.01 | | 0.11 | | 0.07 | | 0.06 | | 0.01 | | 0.01 | | 0.11 |
| MgO | 4.28 | 3.88 | 7.08 | 6.09 | | 6.56 | | 7.05 | | 7.29 | | 5.90 | | 7.18 | | 6.56 |
| NiO | 0.00 | 0.00 | 0.00 | 0.00 | | 0.00 | | 0.00 | | 0.00 | | 0.00 | | 0.00 | | 0.00 |
| CaO | 8.41 | 7.82 | 11.08 | 11.83 | | 10.01 | | 10.70 | | 11.83 | | 10.79 | | 11.72 | | 10.01 |
| Na2O | 9.99 | 10.23 | 8.70 | 8.22 | | 9.69 | | 9.06 | | 8.83 | | 8.96 | | 8.62 | | 9.69 |
| K2O | 0.01 | 0.08 | 0.01 | 0.03 | | 0.01 | | 0.05 | | 0.02 | | 0.01 | | 0.01 | | 0.01 |
| **Total** | 102.57 | 102.48 | 101.46 | 102.31 | | 102.69 | | 102.65 | | 102.68 | | 102.58 | | 102.02 | | 102.69 |
| **Cations (based on 6 oxygens)** | | | | | | |  | |  | |  | |  | |  | |
| Si | 2.032 | 2.038 | 2.007 | 2.024 | | 2.016 | | 2.000 | | 1.998 | | 2.030 | | 2.000 | | 2.016 |
| Ti | 0.013 | 0.010 | 0.002 | 0.004 | | 0.001 | | 0.005 | | 0.006 | | 0.00 | | 0.007 | | 0.001 |
| Cr | 0.002 | 0.004 | 0.003 | 0.001 | | 0.00 | | 0.006 | | 0.00 | | 0.005 | | 0.005 | | 0.00 |
| Al | 0.315 | 0.329 | 0.431 | 0.338 | | 0.460 | | 0.422 | | 0.424 | | 0.368 | | 0.396 | | 0.460 |
| Fe3+ | 0.376 | 0.389 | 0.166 | 0.234 | | 0.201 | | 0.190 | | 0.176 | | 0.256 | | 0.185 | | 0.201 |
| Fe2+ | 0.114 | 0.111 | 0.059 | 0.119 | | 0.016 | | 0.060 | | 0.040 | | 0.075 | | 0.064 | | 0.016 |
| Mn | 0.011 | 0.008 | 0.00 | 0.00 | | 0.003 | | 0.002 | | 0.002 | | 0.00 | | 0.00 | | 0.003 |
| Mg | 0.237 | 0.215 | 0.378 | 0.330 | | 0.345 | | 0.374 | | 0.385 | | 0.318 | | 0.384 | | 0.345 |
| Ni | 0.00 | 0.00 | 0.00 | 0.00 | | 0.00 | | 0.00 | | 0.00 | | 0.00 | | 0.00 | | 0.00 |
| Ca | 0.335 | 0.312 | 0.425 | 0.461 | | 0.379 | | 0.408 | | 0.449 | | 0.418 | | 0.451 | | 0.379 |
| Na | 0.720 | 0.738 | 0.604 | 0.580 | | 0.663 | | 0.625 | | 0.607 | | 0.629 | | 0.600 | | 0.663 |
| K | 0.001 | 0.004 | 0.001 | 0.001 | | 0.001 | | 0.002 | | 0.001 | | 0.001 | | 0.001 | | 0.001 |
| **End-members** | | | | |  | |  | |  | |  | |  | |  | |
| Diopside | 0.219 | 0.201 | 0.368 | 0.339 | | 0.359 | | 0.350 | | 0.405 | | 0.338 | | 0.387 | | 0.359 |
| Wollastonite | 0.167 | 0.156 | 0.213 | 0.231 | | 0.189 | | 0.204 | | 0.224 | | 0.209 | | 0.225 | | 0.189 |
| Enstatite | 0.119 | 0.108 | 0.189 | 0.165 | | 0.173 | | 0.187 | | 0.193 | | 0.159 | | 0.192 | | 0.173 |
| Ferrosilite | 0.057 | 0.055 | 0.029 | 0.059 | | 0.008 | | 0.030 | | 0.020 | | 0.037 | | 0.032 | | 0.008 |
| Pyroxmangite | 0.006 | 0.004 | 0.00 | 0.00 | | 0.002 | | 0.001 | | 0.001 | | 0.00 | | 0.00 | | 0.002 |
| CaAl2SiO6 | 0.00 | 0.00 | 0.00 | 0.00 | | 0.00 | | 0.00 | | 0.00 | | 0.00 | | 0.00 | | 0.00 |
| CaFe2SiO6 | 0.00 | 0.00 | 0.00 | 0.00 | | 0.00 | | 0.00 | | 0.00 | | 0.00 | | 0.00 | | 0.00 |
| CaCr2SiO6 | 0.00 | 0.00 | 0.00 | 0.00 | | 0.00 | | 0.00 | | 0.00 | | 0.00 | | 0.00 | | 0.00 |
| Aegirine | 0.376 | 0.389 | 0.166 | 0.234 | | 0.201 | | 0.190 | | 0.176 | | 0.256 | | 0.185 | | 0.201 |
| Jadeite | 0.315 | 0.329 | 0.431 | 0.338 | | 0.460 | | 0.422 | | 0.422 | | 0.368 | | 0.396 | | 0.460 |
| CaTiAl2O6 | 0.00 | 0.00 | 0.00 | 0.00 | | 0.00 | | 0.00 | | 0.001 | | 0.00 | | 0.00 | | 0.00 |

**Table S20**

| **Garnets** | | | | | | |
| --- | --- | --- | --- | --- | --- | --- |
| **Oxides (wt %)** | **1** | **2** | **3** | **4** | | **5** |
| SiO2 | 39.08 | 36.78 | 38.90 | 38.65 | | 38.82 |
| Al2O3 | 21.97 | 21.68 | 21.20 | 21.21 | | 21.33 |
| Fe2O3 | 0.00 | 0.00 | 0.00 | 0.00 | | 0.00 |
| FeO | 33.61 | 31.22 | 30.81 | 29.39 | | 31.81 |
| MnO | 0.46 | 1.08 | 1.11 | 2.02 | | 1.17 |
| MgO | 4.04 | 2.84 | 3.68 | 3.23 | | 3.10 |
| CaO | 4.63 | 7.57 | 7.24 | 7.82 | | 7.30 |
| Na2O | 0.10 | 0.04 | 0.14 | 0.15 | | 0.07 |
| K2O | 0.01 | 0.01 | 0.01 | 0.01 | | 0.01 |
| **Total** | 103.90 | 103.22 | 103.09 | 102.48 | | 103.61 |
| **Cations (based on 12 oxygens)** | | | | | | |
| Si | 3.00 | 3.00 | 3.01 | 3.01 | | 3.00 |
| Al | 1.99 | 1.98 | 1.93 | 1.94 | | 1.94 |
| Fe3+ | 0.00 | 0.00 | 0.00 | 0.00 | | 0.00 |
| Fe2+ | 2.16 | 2.02 | 1.99 | 1.91 | | 2.05 |
| Mn | 0.03 | 0.07 | 0.07 | 0.13 | | 0.08 |
| Mg | 0.46 | 0.33 | 0.42 | 0.37 | | 0.36 |
| Ca | 0.38 | 0.63 | 0.60 | 0.65 | | 0.60 |
| **X** | 3.00 | 3.00 | 3.01 | 3.01 | | 3.00 |
| **Y** | 1.99 | 1.98 | 1.93 | 1.94 | | 1.94 |
| **Z** | 3.03 | 3.04 | 3.09 | 3.07 | | 3.09 |
| **Total** | 8.02 | 8.02 | 8.03 | 8.02 | | 8.03 |
| **End-members** | | | | |  | |
| Grossular | 0.060 | 0.173 | 0.123 | 0.162 | | 0.112 |
| Almandine | 0.698 | 0.655 | 0.625 | 0.608 | | 0.643 |
| Pyrope | 0.158 | 0.110 | 0.144 | 0.126 | | 0.122 |
| Spessartine | 0.010 | 0.024 | 0.025 | 0.045 | | 0.026 |
| Andradite | 0.063 | 0.038 | 0.075 | 0.055 | | 0.087 |
| Uvarovite | 0.002 | 0.00 | 0.00 | 0.00 | | 0.00 |
| Ti-Al Garnet | 0.00 | 0.00 | 0.00 | 0.00 | | 0.00 |
| Na-Ti Garnet | 0.009 | 0.001 | 0.008 | 0.004 | | 0.002 |

**Table S21**
